## **Voltage-gated calcium channel subunit $\alpha_2\delta$ -3 shapes light responses of mouse retinal ganglion cells mainly in low and moderate light levels**

Hartwig Seitter<sup>1,5\*</sup>, Vithiyanjali Sothilingam<sup>2</sup>, Boris Benkner<sup>1,3,5\*</sup>, Marina Garcia Garrido<sup>2\*</sup>, Alexandra Kling<sup>1,3,5\*</sup>, Antonella Pirone<sup>4\*</sup>, Mathias Seeliger<sup>2</sup>, Thomas A. Münch<sup>1,3,6</sup>

<sup>1</sup> Werner Reichardt Centre for Integrative Neuroscience (CIN)  
Otfried-Müller-Str. 25

<sup>2</sup> Division of Ocular Neurodegeneration, Institute for Ophthalmic Research, Centre for Ophthalmology, Schleichstr. 4/3

<sup>3</sup> Bernstein Center for Computational Neuroscience  
Otfried-Müller-Str. 25

<sup>4</sup> Department of Otolaryngology, Tübingen Hearing Research Center, Molecular Physiology of Hearing  
Elfriede-Aulhorn-Str. 5

<sup>5</sup> IMPRS for Cognitive and Systems Neuroscience  
Österbergstr. 3

Eberhard Karls Universität Tübingen  
72076 Tübingen  
Germany

<sup>6</sup> Corresponding author:  
Thomas A. Münch  
Otfried-Müller-Str. 25  
72076 Tübingen  
Phone: +49(0)7071-29-89182  
Email: [thomas.muench@cin.uni-tuebingen.de](mailto:thomas.muench@cin.uni-tuebingen.de)

\*current affiliations pending updates

**Key words:** horizontal cell, ganglion cell, light adaptation, multi-electrode array, RRIDs: IMSR\_JAX:005780, AB\_10000347, AB\_10000340, AB\_304560, AB\_2079751, AB\_1608076, AB\_307210, SciRes\_000137, SciRes\_000168

### **Support or grant information:**

The study was supported by funds from the Werner-Reichardt Centre for Integrative Neuroscience Tübingen (CIN, DFG EXC 307) and the Bernstein Center for Computational Neuroscience Tübingen (BMBF, FKZ 01GQ1002).

## Abstract

Little is known about the function of the auxiliary  $\alpha_2\delta$  subunits of voltage-gated calcium channels in the retina. We investigated the role of  $\alpha_2\delta$ -3 (*Cacna2d3*) using a mouse in which  $\alpha_2\delta$ -3 was knocked out by LacZ insertion. Behavior experiments indicated a normal optokinetic reflex in  $\alpha_2\delta$ -3 knockout animals. Strong expression of  $\alpha_2\delta$ -3 could be localized to horizontal cells using the LacZ-reporter, but horizontal cell mosaic and currents carried by horizontal cell voltage-gated calcium channels were unchanged by the  $\alpha_2\delta$ -3 knockout. *In vivo* electroretinography revealed unaffected photoreceptor activity and signal transmission to depolarizing bipolar cells. We recorded visual responses of retinal ganglion cells with multi-electrode arrays in scotopic to photopic luminance levels and found subtle changes in  $\alpha_2\delta$ -3 knockout retinas. Spontaneous activity in OFF ganglion cells was elevated in all luminance levels. Differential response strength to high- and low-contrast Gaussian white noise was compressed in ON ganglion cells during mesopic ambient luminance and in OFF ganglion cells during scotopic and mesopic ambient luminances. In a subset of ON ganglion cells, we found a sharp increase in baseline spiking after the presentation of drifting gratings in scotopic luminance. This increase happened after gratings of different spatial properties in knockout compared to wild type retinas. In a subset of ON ganglion cells of the  $\alpha_2\delta$ -3 knockout, we found altered delays in rebound-like spiking to full-field contrast steps in scotopic luminance. In conclusion,  $\alpha_2\delta$ -3 seems to participate in shaping visual responses mostly within brightness regimes when rods or both rods and cones are active.

## Introduction

Voltage-gated calcium channels (VGCC) of the L-, P/Q-, R- and N-Type form multimeric complexes composed of pore-forming  $\alpha_1$  subunits, modulatory  $\beta$  subunits and auxiliary  $\alpha_2\delta$  subunits (Dolphin, 2012). The  $\alpha_1$  subunits determine the main biophysical and pharmacological characteristics of the VGCC complex (Catterall et al., 2005),  $\beta$  subunits modulate channel properties, while the  $\alpha_2\delta$  subunits mainly promote trafficking (Davies et al., 2007) and targeting of the VGCC complexes (Thoreson et al., 2013), e.g. to lipid rafts (Robinson et al., 2011). Thus,  $\alpha_2\delta$  subunits increase calcium current densities and participate in establishing calcium nanodomains. Recent studies have shown a role of  $\alpha_2\delta$  subunits in synaptogenesis, independent of their association with a calcium channel (Kurshan et al., 2009), as well as in synaptic structuring (Pirone et al., 2014).  $\alpha_2\delta$  subunits get cleaved post-translationally into  $\alpha_2$  and  $\delta$  parts and re-linked by disulfide bonds: The  $\delta$  part anchors  $\alpha_2\delta$  to the plasma membrane, putatively by a glycosylphosphatidylinositol (GPI) anchor (Davies et al., 2010), whereas the highly glycosylated extracellular  $\alpha_2$  part links  $\alpha_2\delta$  to the  $\alpha_1$  subunits (Gurnett et al., 1997). Four isoforms of  $\alpha_2\delta$  have been described, termed  $\alpha_2\delta$ -1 to  $\alpha_2\delta$ -4 (Curtis and Catterall, 1984; Leung et al., 1987; Ellis et al., 1988; Klugbauer et al., 1999; Qin et al., 2002).

In vertebrate retina, photoreceptors mainly express VGCC containing the  $\alpha_1$  subunit  $\text{Ca}_v1.4$  (Morgans, 2001),  $\beta_2$  (Ball et al., 2002) and  $\alpha_2\delta$ -4 (Wycisk et al., 2006). Loss of  $\alpha_2\delta$ -4 leads to an altered b-wave in the electroretinogram and to photoreceptor degeneration (Wycisk et al., 2006), reminiscent to what is observed in  $\beta_2$  knockout mice (Ball et al., 2002). The other ribbon synapse-bearing cell types of the retina, the bipolar cells, also expresses  $\alpha_2\delta$ -4 in tiger salamander (Thoreson et al., 2013) and mouse (de Sevilla Muller et al., 2013). So far only few studies have investigated the expression of the other three  $\alpha_2\delta$  subtypes in the retina. Rat retinal ganglion cells were

found to express  $\alpha_2\delta$ -1, acting as a receptor for thrombospondins (Eroglu et al., 2009).

Expression of  $\alpha_2\delta$ -3 has been reported in ON bipolar cells isolated from mouse retina (Nakajima et al., 2009) and evidence from co-immunolabeling suggests widespread expression in photoreceptors, bipolar cells, glycinergic amacrine cells and most cells in ganglion cell layer (Pérez de Sevilla Müller et al., 2015). The physiological significance of  $\alpha_2\delta$  subunit function in mouse retina is largely unclear.

In the present study, we used an  $\alpha_2\delta$ -3 (*Cacna2d3*) knockout mouse (Neely et al., 2010) to study the functional aspects of  $\alpha_2\delta$ -3 in the mammalian retina.

## Materials & Methods

All procedures were carried out at room temperature unless otherwise noted.

Chemicals were obtained from Sigma Aldrich unless otherwise noted.

### *Animals*

For RT-PCR experiments, wild type mice of the C3H strain (Sanyal and Bal, 1973) were used. All other experiments were carried out on B6.129P2-*Cacna2d3*<sup>tm1Dgen/J</sup> mice (The Jackson Laboratory, RRID: IMSR\_JAX:005780), where  $\alpha_2\delta$ -3 (gene name *Cacna2d3*) has been knocked out by targeted insertion of a LacZ reporter (*Cacna2d3*<sup>+/+</sup> will be referred to as wild type and *Cacna2d3*<sup>-/-</sup> as knockout animals, for genotyping protocols refer to The Jackson Lab). Animals of either sex were used for experiments. Mice were kept in a 12/12 hour dark/light cycle and were used for each set of experiments on approximately the same circadian time of day. Animal use was in accordance with German and European regulations and approved by the Regierungspräsidium Tübingen.

### *Behavioral tests: Optokinetic drum*

The visual performance of wild type and knockout mice was examined on the behavioral level in a virtual arena, based on the optokinetic reflex (OKR). The head movements of the mouse were used as the behavioral read-out. The freely moving mouse was placed on an elevated platform in the middle of the arena consisting of four computer monitors. A projection of a virtual cylinder with rotating black and white stripes was presented on the screens. Using an automated camera-based system (Viewer<sup>3</sup>, Biobserve) we were able to automatically adjust the spatial frequency of the stripe patterns on each monitor individually, relative to the head position of the animal, so the stripe pattern appeared uniform from the view point of the mouse. The rotating stripe pattern elicited head movements corresponding to the angular velocity of the stimulus, which were detected by the automated camera-based system and analyzed quantitatively by custom-written Mathematica (Wolfram) scripts to determine correct

tracking behavior. To examine the complete range of visual acuity, the spatial frequency of the stimulus was varied between 0.014 and 0.5 cycles per degree (cpd), corresponding to bar widths of 36° to 1°. These stimuli were presented at Michelson contrast levels between 0% (equal stripe color) and 98% (black and white stripes) and rotated clock-wise or counter-clock-wise. For our experiments, rotation speed of the virtual drum was kept at 12°/s (Mitchiner et al., 1976; Abdeljalil et al., 2005; Lagali et al., 2008; Benkner et al., 2013).

#### *RT-PCR (reverse transcription-polymerase chain reaction) of $\alpha_2\delta$ genes on total retinal RNA*

Adult (8-9 weeks old) C3H mice were euthanized by CO<sub>2</sub> and decapitated. Young C3H mice of postnatal days 3, 6, 9, 12 and 15/16 were euthanized by decapitation. Retinas were dissected out in ice-cold RNase-free phosphate-buffered saline (PBS). Remnants of retinal pigment epithelium (RPE) were removed (adult retinas) and both retinas of each animal were put immediately in lysis buffer (RLT, Qiagen or Trizol, Invitrogen). Tissue samples were incubated for several minutes in lysis buffer, followed by strong vortexing. Unlysed tissue pieces were triturated and dispersed by pipetting. RNA was isolated from the lysates with a spin column-based kit, following manufacturer's instructions (RNeasy Mini Kit, Qiagen). The RNA was eluted in nuclease-free water and RNA concentration and quality was measured on a Nanodrop ND-1000 (Thermo Scientific). All RNA samples had a 260/280 ratio above 1.9, indicating good RNA quality. Afterwards, RNA was stored short-term at -20°C or long-term at -150°C or immediately used in a retrotranscription reaction (ProtoScript® AMV First Strand cDNA Synthesis Kit, New England Biolabs or SuperScript® III First-Strand Synthesis System, Invitrogen). In each reaction, 48-55 ng (adult mouse) or 300-450 ng (developmental time line) of RNA was used as template and retrotranscribed with oligo d(T) primers according to the manufacturer's instructions. cDNA products were stored at -20°C and used as templates for polymerase chain reaction (PCR) using cDNA-specific primers for all  $\alpha_2\delta$  transcripts. Primer details are summarized in Table 1. For

negative controls, a reaction with  $\alpha_2\delta$ -3 primers was run in parallel with water as template. The PCR reactions contained 0.2  $\mu$ M forward primer (for), 0.2  $\mu$ M reverse primer (rev), 200  $\mu$ M dATP, dTTP, dCTP and dGTP each, 1.5 mM MgCl<sub>2</sub>, 0.125  $\mu$ l Standard-Taq polymerase (New England Biolabs), 1  $\mu$ l template cDNA, 2.5  $\mu$ l 10X reaction buffer (New England Biolabs), nuclease-free water to fill up to 25  $\mu$ l total volume. The reaction was set up on ice and run in a thermocycler (BioRad), using a touchdown PCR program: 94°C, 3 min; (94°C, 20 sec; annealing temperature, 30 sec; 72°C, 30 sec) x 35; 72°C, 5 min; 4°C,  $\infty$ . Annealing temperature for all primer pairs started at 66°C, decreasing by 1°C per cycle until 61°C for the remaining cycles.

The PCR products were run on a 1.5% agarose gel, containing 2% midori green (BioZym) or 4% ethidium bromide (Carl Roth) in tris-borate-EDTA buffer (TBE) and visualized using normal UV excitation and filters for ethidium bromide.

**Table 1: RT-PCR primer details**

| target / gene name             | primer       | sequence (5' --> 3')      | T <sub>m</sub> (°C)* | primer length | amplicon size | reference |
|--------------------------------|--------------|---------------------------|----------------------|---------------|---------------|-----------|
| $\alpha_2\delta$ -1 / Cacna2d1 | Cacna2d1_for | GCACCAAGGGAATACTGCAATGA   | 63.86                | 23            | 587           | **        |
|                                | Cacna2d1_rev | CCACCATCATCTAGAATGACACAGT | 62.69                | 25            |               | **        |
| $\alpha_2\delta$ -2 / Cacna2d2 | Cacna2d2_for | GCATGATTGACGGCGACAAAG     | 63.25                | 21            | 425           |           |
|                                | Cacna2d2_rev | AATGCCCGTGTCCAGAATCAAG    | 63.68                | 22            |               |           |
| $\alpha_2\delta$ -3 / Cacna2d3 | Cacna2d3_for | TACATTGACAGCACCCCTCCC     | 62.06                | 20            | 356           |           |
|                                | Cacna2d3_rev | GCATTTTCGTAACACATCATCCC   | 60.46                | 22            |               |           |
| $\alpha_2\delta$ -4 / Cacna2d4 | Cacna2d4_for | TCCTCTAGCCACAACCAAGACC    | 64.20                | 22            | 480           |           |
|                                | Cacna2d4_rev | AAGAAACTCAGCTCCCAGCTCC    | 64.78                | 22            |               |           |

\*calculated by Perl Primer \*\* (Cole et al., 2005), 3' end shortened

*Immunohistochemistry, LacZ reporter expression and horizontal cell mosaic analysis*

Adult mice were euthanized by CO<sub>2</sub> and decapitated. For cryosections, adult (40 days to 7 months) wild type (*Cacna2d3*<sup>+/+</sup>), knockout (*Cacna2d3*<sup>-/-</sup>), and heterozygous (*Cacna2d3*<sup>+/-</sup>) mice were used. For wholemount LacZ stainings, adult (12 to 23 weeks) wild type and knockout animals were used. For horizontal cell mosaic stainings, adult (4-12 weeks old) littermate pairs of wild type and knockout animals were used. Cornea and lens were removed in PBS and eyecups were fixed in 4% paraformaldehyde in PBS for 30 min on ice, or the retina was dissected out, cut to clover-leaf shape, and mounted on a black nitrocellulose filter paper (Sartorius Stedim) before fixation. After

washing 3 times in PBS for at least 30 min, retinas were dissected out (wholemout stainings) and retinas/eyecups were cryoprotected by equilibration in a sequence of 10%, 20% and 30% sucrose in PBS.

### *Cryosections*

The eyecups were transferred to cryo-embedding medium (Tissue-Tek OCT, Sakura Finetek) and frozen on an aluminum block cooled to -150°C. Oriented slices of 12 µm thickness were cut along the dorso-ventral axis in a cryostat (CM3050, Leica), mounted on coated glass slides (Superfrost Plus®, Carl Roth) and dried at 37°C for 30-60 minutes. Slices were stored at -20°C until use. Before proceeding with immunohistochemical staining, slices were thawed and washed 3 times for 10 min in PBS.

Cryoslices were incubated for 12-24 hours at 4°C in a humid chamber with primary antibodies diluted in 10% NGS, 1% BSA, and 0.5% Triton X-100. Antibodies and their dilutions are summarized in Table 2 and their characterization is described below. For negative controls, no primary antibodies were added. Slices were washed 3 times for 10 min in PBS and incubated for 1 hour in a humid chamber with secondary antibodies diluted in PBS, supplemented with 0.5% Triton X-100. Slices were washed 3 times for 10 min in PBS, before being submitted to an X-Gal staining procedure: X-Gal (5% in N,N-dimethylformamide, Carl Roth) was diluted 1:30 in staining solution pre-warmed to 42°C (in mM: 7.2 Na<sub>2</sub>HPO<sub>4</sub>, 2.8 NaH<sub>2</sub>PO<sub>4</sub>, 150 NaCl, 1 MgCl<sub>2</sub>, 3 K<sub>3</sub>(Fe(CN)<sub>6</sub>), 3 K<sub>4</sub>(Fe(CN)<sub>6</sub>); all from Carl Roth, except MgCl<sub>2</sub>, Sigma) and incubated for 12-24 hours at 37°C. Staining was stopped by washing 3 times for 10 min in PBS. Afterwards, slices were washed once in double-distilled water prior to mounting with Vectashield (Vector Laboratories). Images were acquired with an upright epifluorescence microscope (Zeiss Imager Z1), using same settings for stainings and controls, and histograms were adjusted with the min/max function in Zeiss Axiovision software. Images were processed in Adobe Photoshop CS4 and adjusted with the standard auto-contrast function.



### *Wholemout stainings*

Retinas were frozen three times at -150°C and thawed at room temperature for better antibody penetration. The retinas were washed three times for 30 minutes in PBS before proceeding with immunohistochemical staining.

Blocking was done in blocking solution (10% normal donkey serum (NDS) or normal goat serum (NGS, for cryoslices), 1% bovine serum albumine (BSA, Carl Roth), 0.5% Triton X-100 in PBS), 0.02% sodium azide for one hour.

One retina of each animal was incubated for 7 days with primary antibodies (see Table 2 and characterization below) diluted in 3% NDS, 1% BSA, 0.5% Triton X-100, 0.02% Na-azide in PBS, gently shaking. The second retina served as a negative control, without addition of primary antibodies. Retinas were washed three times for one hour in PBS after primary antibody incubation. Retinas were incubated with secondary antibodies (Table 2) diluted in 0.5% Triton X-100 in PBS for 24 hours, gently shaking. When biotinylated antibodies were used, retinas were washed three times for 30 min in PBS and incubated with streptavidin-Cy5 in secondary antibody solution for 2-4 hours, gently shaking. Retinas were washed three times for one hour in PBS, cut to clover-leaf shape and flat-mounted on glass slides in Vectashield (Vector Laboratories). Adhesive tape was used as a spacer before adding the coverslip and sealing with nail polish. The stainings and negative controls were evaluated on an upright epifluorescence microscope (Zeiss Imager Z1). The stainings were then visualized on a confocal laser scanning microscope in detail (Zeiss LSM 710). Pinhole sizes were adjusted to the same optical Z-slice thickness for multichannel images.

**Table 2: Antibodies and streptavidins used in immunohistochemical stainings on cryosections (c)**

| <b>Antibody name</b>             | <b>Immunogen</b>                                            | <b>Supplier, catalog #, RRID</b>               | <b>Host species, clonality</b> | <b>Dilutions used</b> |
|----------------------------------|-------------------------------------------------------------|------------------------------------------------|--------------------------------|-----------------------|
| Calbindin D-28K                  | calbindin D-28k purified from chicken gut                   | Swant, 300, AB_10000347                        | Mouse, monoclonal IgG1         | 1:500 (c)             |
| Calbindin D-28K                  | recombinant rat calbindin D-28k                             | Swant, CB-38, AB_10000340                      | Rabbit, polyclonal             | 1:1000 (w)            |
| Neurofilament H                  | Full length native protein (cow spinal cord)                | Abcam, ab4680, AB_304560                       | Chicken, polyclonal IgY        | 1:1000 (w)            |
| Choline Acetyltransferase (ChAT) | Human placental enzyme                                      | Millipore, AB144P, AB_2079751                  | Goat, polyclonal               | 1:280 (w)             |
| Melanopsin                       | 15 N-terminal extracellular amino acids of mouse melanopsin | Advanced Targeting Systems, AB-N39, AB_1608076 | Rabbit, polyclonal             | 1:2800 (w)            |
| $\beta$ -galactosidase           | Full length native protein (purified, E. coli)              | Abcam, ab9361, AB_307210                       | Chicken, polyclonal IgY        | 1:500 (w)             |
| Anti-mouse/Alexa 488             | IgG (H+L)                                                   | Life Technologies, A-21202, AB_10049285        | Donkey, polyclonal IgG         | 1:750 (c)             |
| Anti-rabbit/Alexa 555            | IgG (H+L)                                                   | Life Technologies, A-31572, AB_10562716        | Donkey, polyclonal IgG         | 1:400 (w)             |
| Anti-chicken/FITC                | IgG (H+L)                                                   | Jackson ImmunoResearch 703-095-155, AB_2340356 | Donkey, polyclonal IgG         | 1:400 (w)             |
| Anti-goat/biotin                 | IgG (H+L)                                                   | Life Technologies, D-20698, AB_10375584        | Donkey, polyclonal IgG         | 1:400 (w)             |
| Streptavidin/Cy5                 | nA                                                          | Rockland Immunochemicals S000-06, AB_2341143   | nA                             | 1:200 (w)             |

#### *Antibody characterization*

The mouse monoclonal anti-calbindin antibody (Swant Cat# 300 RRID:AB\_10000347) was generated against calbindin D-28k purified from chicken. In western blots, the antibody detects a single ~28-kDa band in brain extracts of mouse, rat, guinea pig, rabbit and macaque. There is no immunoreactivity of the antibody on hippocampal sections of calbindin D-28k knockout mice (manufacturer's data sheet, (Celio et al., 1990; Airaksinen et al., 1997)). This antibody is widely used as a marker for retinal

horizontal cells in the mouse (Janssen-Bienhold et al., 2009; Phillips et al., 2010) and showed the same labeling pattern as previously described (Haverkamp and Wässle, 2000).

The rabbit polyclonal anti-calbindin antibody (Swant Cat# CB 38 RRID:AB\_10000340) was generated against recombinant rat calbindin D-28K. In western blots, the antibody detects a single ~28 kDa band in brain lysates from mouse, rat, guinea pig, rabbit, macaque and chicken. There is no immunoreactivity of the antibody on cerebellar sections of a calbindin D-28k knockout mice (manufacturer's data sheet). There is minimal cross-reactivity with calretinin, that gives a ~30 kDa band in western blots and can also reveal calretinin expression in immunostainings. On the distal inner nuclear layer, the staining however is specific for horizontal cells (Haverkamp et al., 2008; Guo et al., 2009). This antibody is widely used as a marker for retinal horizontal cells in the mouse and showed the same labeling pattern as previously described (Haverkamp and Wässle, 2000).

The chicken polyclonal anti-neurofilament H antibody (Abcam Cat# ab4680, RRID:AB\_304560) was generated against purified neurofilaments from bovine spinal cord. Its specificity is confirmed for immunohistochemistry (manufacturer's data sheet, (Mandadi et al., 2013)). The labeling pattern was the same as in another neurofilament H antibody, selectively labeling axonal arborizations of horizontal cells in the outer plexiform layer (Shelley et al., 2006). Also, in retinal dissociations we observed co-labeled putative horizontal cell axonal arborizations which stained positive for calbindin and the neurofilament antibody.

The goat polyclonal anti-choline acetyltransferase antibody (Millipore Cat# AB144P, RRID:AB\_2079751) was generated against human placental enzyme. In western blots, the antibody detects a 68-kDa band e.g. in NIH/3T3 lysate (manufacturer's data sheet). In the retina, the antibody labels cholinergic ON and OFF starburst amacrine cells and their stratifications in sublaminae 2 and 4 of the inner plexiform layer (Yip et al., 1991; Yonehara et al., 2011).

The rabbit polyclonal anti-melanopsin antibody (Advanced Targeting Systems Cat# AB-N39, RRID:AB\_1608076) was generated against the 15 N-terminal extracellular amino acids of mouse melanopsin. Saporin conjugated to this antibody selectively ablates melanopsin-expressing RGC-5 cells and melanopsin-positive ganglion cells in mouse retina (Göz et al., 2008).

The chicken polyclonal anti- $\beta$ -galactosidase antibody (Abcam Cat# ab9361, RRID:AB\_307210) was generated against the full length native protein, purified from E.coli. There is no immunoreactivity in mouse brain samples, that do not transgenetically express  $\beta$ -galactosidase (Scott et al., 2009). We never observed immunoreactivity with this antibody in the retina of wild type animals (which are LacZ negative).

#### *Horizontal cell mosaic analysis*

Horizontal cells and their processes were stained with antibodies against calbindin and neurofilament H in retinal wholemounts. Confocal Z-stacks (5 to 10 Z planes) were acquired with a 10X objective (NA 0.3, 0.83  $\mu$ m pixel size), covering the retinal wholemount (850 \* 850  $\mu$ m per image), so that all horizontal cells stained were completely visualized including their processes. Overlap between neighboring images was set to 20%. Z-stacks were maximum intensity projected in ZEN 2011 (Zeiss), contrast-adjusted in Fiji (RRID:SciRes\_000137, (Schindelin et al., 2012)) and combined with the grid stitch plugin (Preibisch et al., 2009) to yield complete retinal wholemounts. From these, an image part of each of the two dorsal and ventral leaves per wholemount was selected in Photoshop CS4 (Adobe), covering the middle 50% from the optic nerve to outer rim span (see Fig. 5A). The images were analyzed in a custom-written Wolfram Mathematica script to detect cells and compute spacing and mosaic regularity. The neurofilament channel was subtracted from the calbindin channel to produce cleaned-up horizontal cell somata (Peichl and Gonzalez-Soriano, 1994). Images were binarized after adjusting images with dilation/erosion functions. Cell bodies were automatically detected and centroid positions were extracted.

Automatic detection correctly identified between 75 to over 95% of cells, which was then manually corrected for false-positives and false-negatives. With the centroid position information, nearest neighbor distance for each cell could be calculated. Data analysis and statistics were done with Mathematica. For significance testing, the means of the nearest neighbor distances from each individual evaluated image were used (two dorsal and two ventral from each retina).

#### *Patch-clamp recordings of isolated horizontal cells*

##### *Retina dissociation procedure*

Adult (5-16 weeks old) wild type and knockout mice were anaesthetized by CO<sub>2</sub>, euthanized by cervical dislocation, and retinas were dissected out in CO<sub>2</sub>-independent medium A (per 100 ml): 97 ml HBSS - Ca/Mg free (Biochrom, L2055), 1 ml 10 mM EDTA (final: 0.1 mM, Sigma, E-6511), 1 ml 1 M HEPES (final: 10 mM, Biochrom, L1613), 1 ml 10.000 U/ml Penicillin/Streptomycin (final: 100 U/ml, Biochrom, A2213). Retinas were incubated in a papain solution (medium A, supplemented with 1 mM L-Cysteine (Sigma, C-1276), 20 U/ml papain (Worthington, LS003126)) for 25-40 min at 37°C. Meanwhile medium B was pre-incubated in 5% CO<sub>2</sub>. Medium B (per 100 ml): 10 ml 10X DMEM (Biochrom, F0455), 83.3 ml tissue culture water (PromoCell, C-49998), 2.7 ml 7.5% Sodium bicarbonate (final: 24.11 mM, Biochrom, L1713), 1 ml 1 M HEPES (final: 10 mM, Biochrom, L1613), 2 ml 200 mM L-Glutamine (final: 4 mM, Biochrom, K0283), 1 ml 10.000 U/ml Penicillin/Streptomycin (final: 100 U/ml, Biochrom, A2213). Papain digestion was stopped by replacing the papain solution with DNase solution (90% Medium B, 10% fetal calf serum (PAA, A15-101), 100 U/ml DNase I (Sigma, D-5025)) and incubating for 5 min at 37°C. Retinas were centrifuged in a tabletop centrifuge (500 rpm, 3 min) and washed twice with medium B prior to mechanical trituration with fire-polished glass pipettes. In most experiments further gentle dissociation was achieved by shaking the tube for 5-10 min on the slowest setting of a vortexer (Vortex-Genie 2, Scientific Industries). Dissociated cells were seeded on coated coverslips (Ø 12 mm, Gerhard Menzel GmbH, CB00120RA1,

coating: 1 mg/ml Concanavalin-A (Sigma, C-7275) in PBS) and kept in medium B at 37°C in 95% O<sub>2</sub>/5% CO<sub>2</sub> for at least 30 minutes until use. Coverslips were transferred to a recording chamber inside an upright microscope and solution was switched to external solution (see below).

#### *Whole-cell patch-clamp recordings*

Patch pipettes were pulled from borosilicate glass (Science Products, GB150F-8P), backfilled with internal solution (see below) and had resistances of 4-8 MΩ. Cells were viewed on a digital camera through a 60X water immersion objective (Olympus, NA 1.0) under infrared illumination and horizontal cells were identified by their characteristic morphology (Schubert et al., 2006). Currents were recorded through a patch-clamp amplifier (EPC-10, HEKA) on a computer running PatchMaster (v2x69, RRID:SciRes\_000168, HEKA). Internal and external solutions were designed to isolate currents carried by voltage-gated Ca channels.

Internal solution (mM): 110 Cs-methanesulfonate (C1426), 20 TEA (tetraethylammonium)-Cl (T2265), 10 Phosphocreatine-Tris (Santa Cruz, sc-212557), 10 HEPES (4-(2-hydroxyethyl)-1-piperazineethanesulfonic acid, H3375), 5 EGTA (ethylene glycol tetraacetic acid, 03780), 4 ATP (Adenosine triphosphate)-Na (A3377), 0.2 GTP (Guanosine triphosphate)-Na (G8877), 0.51 CaCl<sub>2</sub> (C5080, free concentration ~20 nM, calculated with WinMAXC32 v2.50, (Patton et al., 2004)), 4 MgCl<sub>2</sub> (M2670), pH = 7.2 with CsOH (516988), osmolality 295 mOsm/kg. Chemicals from Sigma, unless noted otherwise.

External solution (mM): 123 NaCl (VWR, 27810.295), 5 KCl (P9333), 10 TEA-Cl (T2265), 10 BaCl<sub>2</sub> (342920), 1 MgCl<sub>2</sub> (M2670), 10 HEPES (H3375), 10 D-Glucose (G7528), 1 μM TTX (Biotrend, BN0518), pH = 7.4 with NaOH (S2770), osmolality 305 mOsm/kg. Chemicals from Sigma, unless noted otherwise. For cobalt block experiments, BaCl<sub>2</sub> was equimolarly substituted with CoCl<sub>2</sub> (Sigma, C8661).

Liquid junction potential with these solutions was 14.5 mV (calculated with JPCalc, (Barry, 1994)) and was partially corrected online (set to 10 mV). Post-recording correction was not applied.

Horizontal cell resting membrane potentials were determined by current-clamp to 0 pA directly after establishing whole-cell configuration. Cell capacitances were determined by the Cslow function of the HEKA amplifier. Membrane resistance was generally > 1 G $\Omega$  during recording. Cells were held at -60 mV in between voltage protocols. Recording protocols started two minutes after break-in and were interleaved by 30-s pauses in between each protocol. Voltage protocols included (1) maximum current measurements with 50 ms steps to 0 mV, (2) current-voltage (IV) curves with 50 ms steps from -70 to +60 mV and (3) inactivation protocols with 400 ms inactivation steps from -60 to +20 mV and an additional 50 ms test step to 0 mV. Current amplitudes were calculated from the average during the second half (25 ms) of the test steps in each protocol. IV curves were fitted according to the following equation:  $I = G_{\max} (V - V_{\text{rev}}) / \{ 1 + \exp [ - (V - V_{0.5,\text{act}}) / k_{\text{act}} ] \}$ , where  $I$  is the current amplitude,  $G_{\max}$  is the maximum slope conductance,  $V$  is the test potential,  $V_{\text{rev}}$  is the reversal potential,  $V_{0.5,\text{act}}$  is the half-maximal activation voltage and  $k_{\text{act}}$  is the slope factor (Ortner et al., 2014). Fitting and parameter calculations were done in SigmaPlot (v12.0, Systat Software).

Recordings were done using p/n leak subtraction (25% magnitude, 4 repetitions, min/max -128 mV/-50 mV). Within each voltage protocol, holding potential was -80 mV. At the beginning of each protocol a 50 ms test pulse to -90 mV was applied. The current difference (non-leak subtracted data) during and after the test pulse was used to calculate input resistance ( $R_{\text{in}}$ ) offline using Ohm's law. Series resistance ( $R_{\text{ser}}$ ) was read off the amplifier's Cslow function after each voltage protocol. Membrane resistance ( $R_{\text{mem}}$ ) was calculated by  $R_{\text{mem}} = R_{\text{in}} - R_{\text{ser}}$ . For maximum current analysis, only voltage protocols were considered that fulfilled two criteria: (1)  $R_{\text{ser}} < 10\% R_{\text{mem}}$ . (2) mean deviation from zero during 0 mV step > mean deviation from zero during

100 ms before step. Since maximum current amplitude slowly increased with recording time, only maximum current protocols between two and five minutes after break-in were considered for analysis. Only IV curves with clear U-shaped fits were used for analysis. Inactivation data to use for analysis was chosen manually. Data was analyzed with Matlab (Mathworks) and tested for significant differences using Wilcoxon ranksum test.

### *Electroretinography (ERG)*

Animals used for ERG recordings were 27-28 days old littermates (n = 5 wild type, n = 4 knockout animals from 5 litters). ERGs were recorded as described previously (Tanimoto et al., 2009). Mice were anaesthetized using ketamine (66.7 mg/kg body weight) and xylazine (11.7 mg/kg body weight). The pupils were dilated and single-flash responses were obtained under scotopic (dark-adapted overnight) and photopic (light-adapted with a background illumination of 30 cd/m<sup>2</sup> starting 10 minutes before recording). Single white-flash stimuli ranged from -4 to 1.5 log cd\*s/m<sup>2</sup> under dark-adapted conditions, and from -2 to 1.5 log cd\*s/m<sup>2</sup> under light-adapted conditions. Ten responses were averaged, with interstimulus intervals of 5 s (for -4 to -0.5 log cd\*s/m<sup>2</sup>) or 17 s (for 0 to 1.5 log cd\*s/m<sup>2</sup>).

### *Multi-electrode array (MEA) recordings: Experimental procedure*

Adult (9-12 weeks old) wild type and knockout mice were dark-adapted for at least 4 hours, euthanized by cervical dislocation and retinas were isolated under dim red light in Ringer's solution containing (in mM): NaCl 110, KCl 2.5, CaCl<sub>2</sub> 1, MgCl<sub>2</sub> 1.6, D-glucose 10, NaHCO<sub>3</sub> 22; bubbled with 5% CO<sub>2</sub>/95% O<sub>2</sub>; pH 7.4. Retinas were mounted on a nitrocellulose filter paper (Millipore) with a 2–3 mm rectangular aperture in the center, transferred to a 60-electrode perforated multi-electrode array (MEA) chamber (60pMEA200/30iR-Ti-gr, Multichannel Systems) and placed ganglion cell-side down on the recording electrodes. The inter-electrode distance was 200 μm, interspersed by holes through which gentle suction was applied. The MEA was put in an upright microscope, where light stimulation was supplied through the microscope



condenser by a digital light processing (DLP) projector (PG-F212X-L, Sharp), presenting a diverse set of visual stimuli focused onto the photoreceptors. One batch of stimuli lasted 28 to 40 minutes and was shown at least twice per ambient luminance level. Specific luminance levels were achieved by inserting neutral density filters into the light path. The neutral density (ND) filters (Thorlabs NE10B-A to NE50B-A), had optical densities from 1 ("ND1", i.e. 10-fold light attenuation) to 5 ("ND5", 10<sup>5</sup>-fold attenuation). To achieve light attenuation stronger than 5 log units, two ND filters were combined in series. Experiments started at ND8 ('scotopic'; darkest setting, 10<sup>8</sup>-fold attenuation) and continued over ND6 ('mesopic'; 10<sup>6</sup>-fold attenuation) to ND4 ('photopic'; 10<sup>4</sup>-fold light attenuation). A shutter was closed while changing ND filters during the experiment to prevent intermittent exposure to unattenuated light. During the whole experiment the retina was continuously superfused with Ringer's solution pre-warmed to 38°C by an in-line heating system just before the MEA chamber (33-35°C inside the recording chamber). In this study, total recording times were up to 4.5 hours. Detailed description of the MEA recording procedures can be found in (Reinhard et al., 2014).

### *Stimuli*

All stimuli were gray-scale images with pixel values between '0' ("black") and '255' ("white"). The stimulus projector produced an output spanning 3 log units of light intensities (i.e. 1000-fold difference between black ('0') and white ('255') pixels). We linearized the gamma-function of the projector, so that our background set at '128' corresponded to the middle physical light intensity between '0' and '255'. All stimuli were balanced so their mean light intensity over time was '128'. Each stimulus was preceded by at least 1 s of uniform background gray ('128').

Here, we present data on the following stimuli:

- 1) Full-field Gaussian white noise ("flicker") (Chichilnisky, 2001): Each flicker stimulus consisted of five 20-s episodes of high-contrast flicker interleaved with five 20-s episodes of low-contrast flicker. Screen brightness was updated every

frame (60 Hz), and drawn from a Gaussian distribution with mean '128' and sigma of 38.4 (high contrast) or 7.68 (low contrast). The flicker stimulus was presented four times per ambient luminance level.

- 2) Full-field steps: background gray ('128') → black ('0') → gray ('128') → white ('255') → gray ('128'), 2 s per step ( $\pm 100\%$  Weber contrast).
- 3) Drifting sine wave gratings: 30 different drifting sinusoidal gratings (combinations of six spatial periods: 100, 200, 500, 1000, 2000, 4000  $\mu\text{m}$  and five temporal frequencies: 0.25, 1, 2, 4, 8 Hz) of full contrast (black: '0' to white: '255').

In addition, moving bars and natural movie stimuli were included in our stimulus batch, but are not discussed here.

#### *Light Intensity Measurements*

We measured the spectral intensity profile (in  $\mu\text{W}\cdot\text{cm}^{-2}\cdot\text{nm}^{-1}$ ) of our light stimuli with a calibrated spectrophotometer (USB2000+, Ocean Optics). We then transformed the stimulus intensity into equivalents of photoisomerizations per rod per second, assuming dark-adapted rods, as described previously (Munch et al., 2009). Briefly, the spectrum was converted to photons $\cdot\text{cm}^{-2}\cdot\text{s}^{-1}\cdot\text{nm}^{-1}$ , convolved with the normalized spectrum of rod sensitivity (Umino et al., 2008), and multiplied with the effective collection area of rods (0.5  $\mu\text{m}^2$ ) (Nikonov et al., 2005). The mean light intensity (=background '128') used in this study was 4  $\text{Rh}\cdot\text{s}^{-1}$  per rod (ND8, 'scotopic'),  $4\cdot 10^2$   $\text{Rh}\cdot\text{s}^{-1}$  per rod (ND6, 'mesopic') and  $4\cdot 10^4$   $\text{Rh}\cdot\text{s}^{-1}$  per rod (ND4, 'photopic').

#### *Spike sorting*

Data was recorded at 25 kHz with a USB-MEA-system (USB-MEA1060, Multichannel Systems), high-pass filtered (500Hz, 10th-order butterworth filter) and spikes were extracted by thresholding. Spike sorting (assignment of spikes to "units", presumably individual ganglion cells) was performed semi-manually with an in-house written Matlab (Mathworks) routine, using 2-dimensional projections of e.g. spike amplitude, principal components, Euclidian distance to template waveforms. Quality of each unit

was assessed by interspike interval and spike shape variation. Data analysis was based on the spike times of individual units.

#### *Spike rate calculation*

The instantaneous spike rate of each unit was calculated by convolving the spike train with a Gaussian with  $\sigma = 40$  ms and amplitude =  $.25 \sqrt{e} \sigma^{-1}$  ( $\approx 10$  Hz for  $\sigma = 40$  ms) and was used for further analysis in Matlab. Single units will be referred to as individual “cells” in the following text.

#### *Determining cell polarity using the spike-triggered average.*

We calculated spike-triggered averages (Chichilnisky, 2001) in response to the Gaussian flicker by summing the 500 ms stimulus history before each spike during high- or low-contrast episodes. The polarity of the spike-triggered average (STA) was assessed manually for each cell and ambient luminance level; if the first peak was negatively deflected, it was categorized as an OFF cell, if positively deflected it was categorized as an ON cell (Tikidji-Hamburyan et al., 2014).

#### *Statistics.*

Statistical significance was tested with Wilcoxon rank sum tests and data was plotted using Matlab.

## Results

### 1. Optokinetic reflex is present in $\alpha_2\delta$ -3 knockout mice

The optokinetic reflex is a simple reflex behavior in which a moving stimulus is followed by the gaze (“tracking”) of the animal with eye and head movements. In our behavioral setup, the mice were put in a virtual optokinetic drum and presented with stripe patterns of uniform stripe width (Benkner et al., 2013). Stimulus intensity was within the photopic regime. For the analysis in this study, we only considered if animals were able to track the stimulus at any of the tested conditions, to establish whether visually guided behavior is developed in  $\alpha_2\delta$ -3 knockout mice. Wild type and  $\alpha_2\delta$ -3 knockout animals performed equally well in this simple visually guided behavior (Fig. 1,  $n = 5$  each), with only one knockout animal not showing clear tracking behavior.

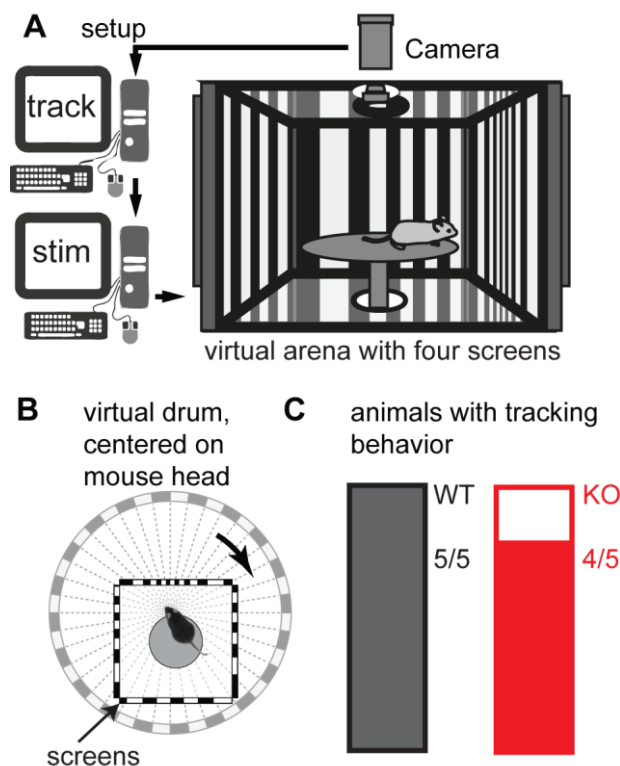

**Figure 1: Optokinetic reflex test.** (A) The “optokinetic drum” virtual arena. Rotating stripe patterns were presented while the mouse was observed from above by a camera. The recorded position of the mouse head was used to adjust stimulus parameters in real time (B), circle = virtual drum, square = actual stripe pattern on the screens. (C) all 5 wild type and 4 out of 5 knockout animals showed clear tracking behavior, indicating an intact optokinetic reflex in  $\alpha_2\delta$ -3 knockout animals.

## 2. All $\alpha_2\delta$ genes are expressed in mouse retina throughout development

We performed RT-PCR to establish which  $\alpha_2\delta$  genes are expressed in the retina. Total RNA was isolated from adult C3H mouse retina ( $n = 3$ ; results were the same with  $\alpha_2\delta$ -3 wild type retinas) as well as developing C3H retina (postnatal days 3, 6, 9, 12, 15/16;  $n = 3$  animals each except  $n = 2$  for P6 and P15/16), and RT-PCR was done using cDNA-specific primers for each gene. Negative controls were performed with water as template and never gave a visible band (not shown). All four  $\alpha_2\delta$  isoforms were consistently detected at all developmental time points (Fig. 2). The double band for  $\alpha_2\delta$ -2 corresponds to different splice isoforms (verified by sequencing).

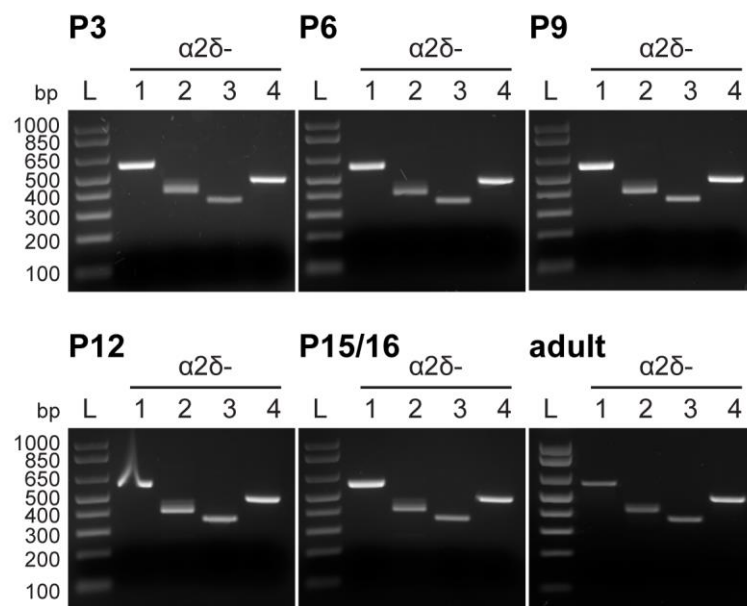

**Figure 2:  $\alpha_2\delta$  mRNA expression in mouse retina.** RT-PCR on total RNA isolated from mouse retina at postnatal day 3 (P3) up to adult. All four  $\alpha_2\delta$  transcripts were found throughout the developmental time points tested and in adult mouse retina ( $n = 3$  each,  $n = 2$  for P6 and P15/P16). Amplicon sizes:  $\alpha_2\delta$ -1 = 587 bp,  $\alpha_2\delta$ -2 = 425 bp,  $\alpha_2\delta$ -3 = 356 bp,  $\alpha_2\delta$ -4 = 480 bp. L = ladder.

## 3. $\alpha_2\delta$ -3 expression is widespread in the mouse retina, but strongest in horizontal cells

To determine the cell types expressing  $\alpha_2\delta$ -3 in mouse retina, we took advantage of the LacZ insert in knockout and heterozygous mice. After immunostaining against markers of retinal cell types in cryo slices, we performed X-gal staining for cells carrying

the LacZ insert. Calbindin - a marker for horizontal cells in mouse retina - showed complete overlap with the X-gal stained cells in the distal inner nuclear layer (INL) (Fig. 3, n = 3 animals). All cells in the distal INL stained for calbindin were also X-gal-positive and vice versa. A very faint X-gal staining was observed in cells in the proximal INL (Fig. 3 A, arrows) and rarely in cells in the ganglion cell layer (Fig. 3 A, arrowhead). We consistently observed this large difference in X-gal staining intensity between horizontal cells and the labeling in proximal INL and ganglion cell layer (GCL). Strong expression of  $\alpha_2\delta$ -3 could also be localized to horizontal cells in wholemount immunohistochemical stainings for  $\beta$ -galactosidase and calbindin in developing mouse retina (postnatal day 11, not shown).

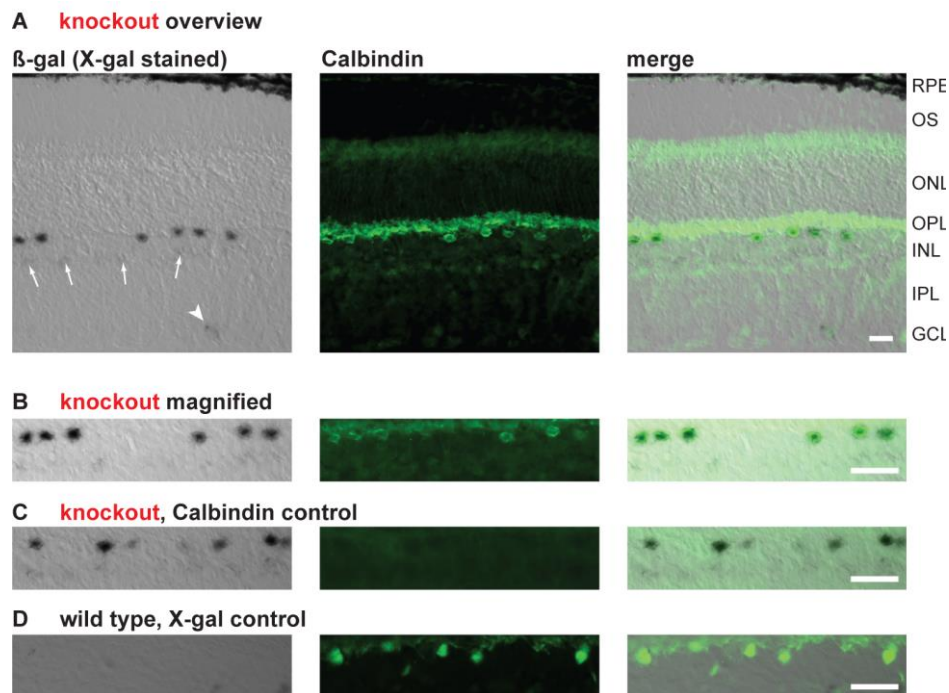

**Figure 3: LacZ expression localization in adult mouse retina.** Horizontal cells were immunohistochemically stained with antibodies against calbindin in cryoslices of knockout/heterozygous and wild type retina and LacZ reporter expression was revealed with X-gal. **(A)** The strongly LacZ-positive cells showed complete overlap with the calbindin-positive cells in the distal inner nuclear layer (INL). Weak X-gal staining was also observed in cells within the proximal INL (arrows) and some rare cells in the ganglion cell layer (arrowhead). **(B)** Higher magnification of the INL region from panel A. Labeling of cells in the outer INL is very strong. **(C)** The X-gal staining pattern was similar without prior immunohistochemical staining of horizontal cells. **(D)** In wild type controls, no X-gal stained cells could be observed. All scale bars: 20  $\mu$ m. Abbreviations: RPE = retinal pigment epithelium, OS = photoreceptor outer segments, ONL = outer nuclear layer, OPL = outer plexiform layer, INL = inner nuclear layer, IPL = inner plexiform layer, GCL = ganglion cell layer.



We used immunohistochemical labeling of  $\beta$ -galactosidase ( $\beta$ -gal) in adult mouse retina for easier co-localization of  $\beta$ -gal expression with other cell type markers. Like in X-gal staining, cells in the distal INL were labeled by  $\beta$ -gal-antibody most intensively (Fig.4 A), while labeling intensity was weaker in proximal INL and GCL (Fig. 4 B+E). We did not find co-localization of the  $\beta$ -gal expression with choline acetyl-transferase (ChAT), a marker for starburst amacrine cells, in the INL (Fig. 4 B-D; n = 3 animals) or in the GCL (not shown). Co-localization of  $\beta$ -gal was found in the majority of Melanopsin-positive ganglion cells in the GCL (Fig. 4 E-G, arrowheads; n = 3 animals) as well as Melanopsin-positive cells in the INL (not shown). Many cells with clear  $\beta$ -gal labeling in the GCL were Melanopsin-negative.

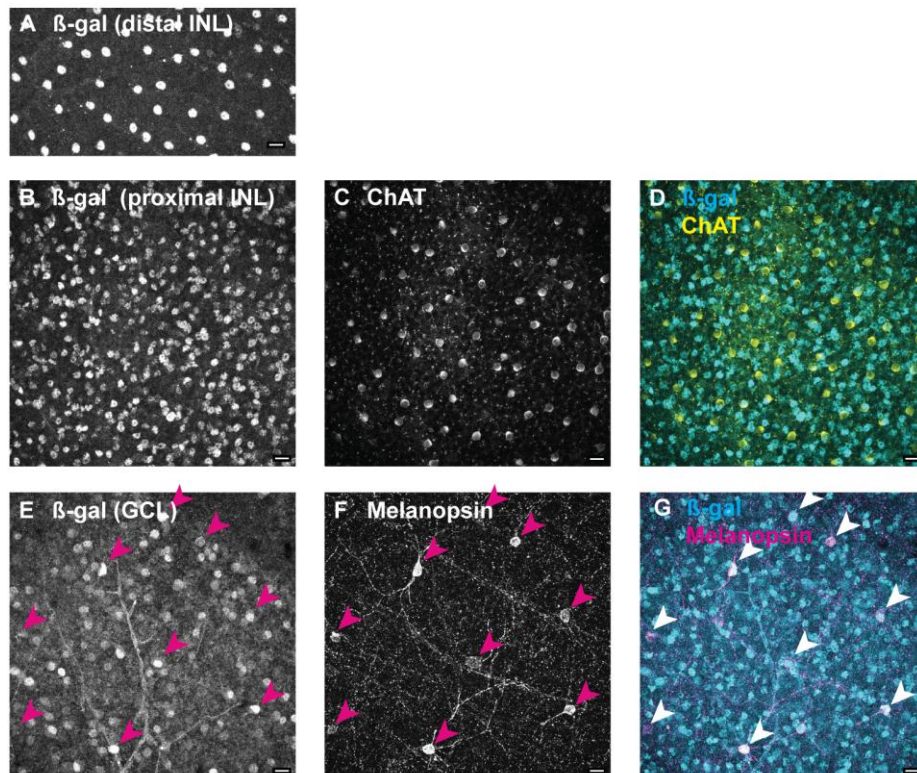

**Figure 4: Immunohistochemical localization of  $\beta$ -galactosidase in retinal wholemounts reveals more LacZ-positive cell types.** LacZ-positive cells were labeled with an antibody against  $\beta$ -galactosidase and counterstained with markers for different cell types. (A) Strong labeling of cells in distal INL was observed, presumably horizontal cells. Staining in proximal INL (B) and GCL (E) was much weaker (images were acquired with the same settings of the confocal microscope).  $\beta$ -galactosidase staining did not co-localize (white in overlay images) with choline acetyltransferase (ChAT) staining in INL (B-D) or GCL (not shown), but with melanopsin staining (E-G). Scale bars: 20  $\mu$ m. Abbreviations: INL = inner nuclear layer, GCL = ganglion cell layer.

#### 4. The horizontal cell mosaic is unperturbed by the $\alpha_2\delta$ -3 knockout

To assess possible disturbances of horizontal cell morphology and survival, we labeled horizontal cells (see methods) in wholemount retinas of adult wild type and knockout mice ( $n = 5$  animals each). We covered dorsal and ventral areas between 25% and 75% retinal eccentricity in our analysis (Fig. 5 A). Horizontal cell soma positions were determined semi-automatically with a custom Wolfram Mathematica script, and nearest neighbor distances were calculated (25932 cells in wild type and 30093 cells in knockout retinas from  $n = 5$  animals each). Nearest neighbor distance was defined as the distance between the centroid position of a given cell body and the centroid position of the cell body closest to it (Fig. 5 B). Nearest neighbor distance was found to increase with retinal eccentricity in both the ventral and the dorsal half of the examined retinas. In the dorsal retina, distances were consistently smaller than in the ventral retina (Fig. 5 C). In dorsal retina, average distances were  $22.11 \pm 2.56 \mu\text{m}$  (wild type) and  $22.03 \pm 2.28 \mu\text{m}$  (knockout). In ventral retina, average distances were  $24.29 \pm 2.79 \mu\text{m}$  (wild type) and  $24.14 \pm 2.57 \mu\text{m}$  (knockout, means  $\pm$  standard deviations). There was no statistically significant difference between wild type and knockout in neither dorsal nor ventral retina ( $p = 0.947$ , dorsal;  $p = 0.900$ , ventral; t-test), while within genotypes the difference between dorsal and ventral was significant ( $p = 0.0095$ , wild type;  $p = 0.033$ , knockout; paired t-test). The corresponding cell densities in dorsal retina were  $1064 \pm 209 \text{ cells/mm}^2$  for wild type and  $1081 \pm 234 \text{ cells/mm}^2$  for knockout retinas. Ventral retina densities were  $906 \pm 190 \text{ cells/mm}^2$  for wild type and  $935 \pm 185 \text{ cells/mm}^2$  for knockout retinas (means  $\pm$  s.d.). We also looked at the horizontal cell densities as a function of retinal eccentricity but did not find any significant differences between genotypes (not shown). The regularity of the horizontal cell mosaic was assessed by looking at the variability of nearest neighbor distance, which is represented in the distribution of distances (Fig. 5 D). A larger variability of nearest neighbor distance would be reflected in a broader distribution, longer tails or larger skewness. We used the standard deviations from the



mean distance of each analyzed image as a statistical measure for variability. We found no significant difference in nearest neighbor distance standard deviations between wild type and knockout in neither dorsal nor ventral retina ( $p = 0.877$ , dorsal;  $p = 0.422$ , ventral; t-test). In summary, we found no effect of the knockout of the  $\alpha_2\delta-3$  gene on horizontal cell number, distribution, and mosaic regularity.

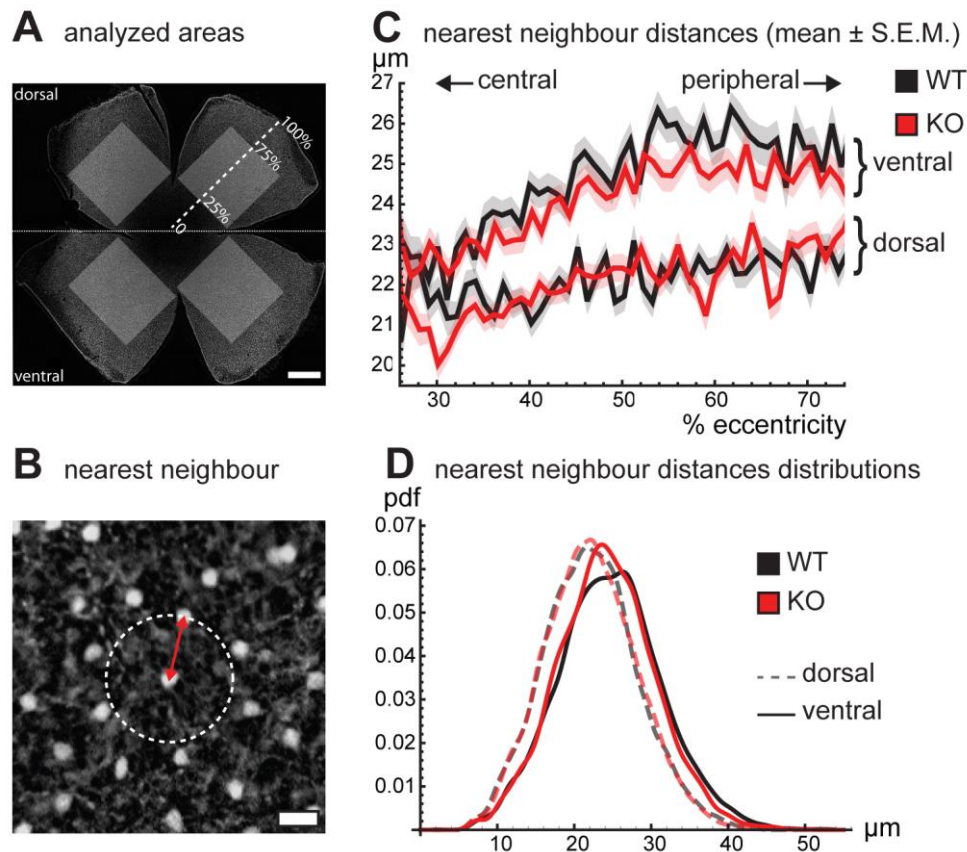

**Figure 5: Horizontal cell mosaic analysis.** (A) Horizontal cells were stained in retinal wholemounts and areas of dorsal and ventral retina from 25% to 75% retinal eccentricity (shaded rectangles; 0% = optic nerve head, 100% = retinal rim) were analyzed. Scale bar: 200  $\mu\text{m}$ . (B) Nearest neighbor distances between cells (red arrow = nearest neighbor distance, dotted circle indicates no other cell within same distance; scale bar: 20  $\mu\text{m}$ ). (C) Nearest neighbor distance plotted as a function of retinal eccentricity shows larger distances between horizontal cells in ventral retina and an overall increase in distances towards the periphery in both wild type and knockout (mean  $\pm$  SEM). (D) Distribution of nearest neighbor distances is very similar between genotypes in either dorsal or ventral retina, indicating a similar regularity of the horizontal cell mosaic. In both genotypes, the distribution in ventral retina is shifted to larger distances (pdf = probability density function). No significant differences of nearest neighbor distances were found between genotypes.

## 5. Currents carried by voltage-gated calcium channels in isolated horizontal cell somata are unchanged

We performed patch-clamp recordings of currents carried by voltage-gated calcium channels (VGCC) from acutely isolated horizontal cell somata in the whole-cell mode to determine an influence of  $\alpha_2\delta$ -3 on calcium currents in these cells. Horizontal cell somata were identified by their characteristic morphology (Fig. 6A). Resting membrane potentials of the recorded horizontal cells were  $-13.06 \pm 5.26$  mV in wild type and  $-12.35 \pm 4.14$  mV in knockout, and membrane capacitances were  $13.38 \pm 3.45$  pF in wild type and  $12.67 \pm 2.25$  pF in knockout (means  $\pm$  s.d.). Currents were recorded using 10 mM barium as charge carrier while other conductances through voltage-gated sodium and potassium channels were blocked pharmacologically (see methods).

We confirmed that the currents were indeed carried by VGCC by blocking them with a solution where  $\text{Ba}^{2+}$  was equimolarly replaced by  $\text{Co}^{2+}$  (Fig. 6 A). Current-voltage relationships were tested with 50 ms steps from  $-70$  mV to  $+60$  mV (Fig. 6 B). No differences were found between genotypes in peak activation voltage (KO:  $-9.12 \pm 7.69$  mV; WT:  $-8.05 \pm 4.99$  mV;  $p = 0.950$ ), half-maximal activation voltage (KO:  $-21.77 \pm 8.19$  mV; WT:  $-20.36 \pm 5.97$  mV;  $p = 0.948$ ), slope factor (KO:  $8.44 \pm 4.03$ ; WT:  $9.29 \pm 5.78$ ;  $p = 0.951$ ) or reversal potential (KO:  $42.58 \pm 7.68$ ; WT:  $46.63 \pm 7.04$ ;  $p = 0.222$ ; all parameters derived from fits of IVs; Wilcoxon ranksum tests;  $n = 9$  each). The small negative peak at  $-50$  mV was consistently observed in many cells of both genotypes. Maximal currents were further investigated with a 50 ms step protocol to  $0$  mV (Fig. 6 C). Maximum current amplitudes were  $-27.29 \pm 12.89$  pA in wild type ( $n = 17$ ) and  $-26.61 \pm 8.99$  pA in knockout ( $n = 14$ , Fig. 6 C), the corresponding current densities were  $-2.14 \pm 1.18$  pA/pF in wild type and  $-2.21 \pm 0.85$  pA/pF in knockout (means  $\pm$  s.d., Fig. 6 D). There was no significant difference between genotypes in maximum current amplitudes ( $p = 0.739$ ) nor current densities ( $p = 0.518$ , Wilcoxon ranksum tests). We looked for voltage-dependent

inactivation by applying protocols with 400 ms long depolarizing steps from -80 mV to different target voltages (-60 mV to +20 mV), followed by a 50 ms test step to 0 mV (Fig. 6 E). We observed little to no voltage-dependent inactivation and no differences between genotypes ( $p > 0.05$ , Wilcoxon ranksum tests).

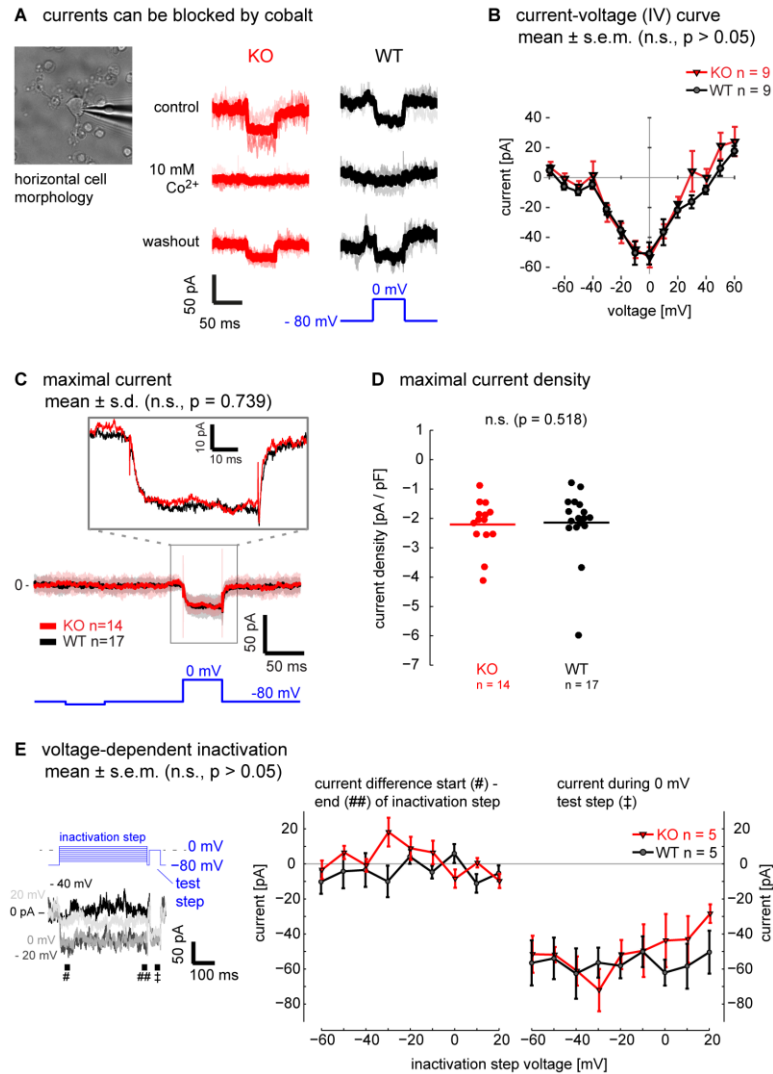

**Figure 6: Patch-clamp recordings.** (A) Acutely isolated horizontal cells were targeted for whole-cell patch-clamp recordings by their characteristic morphology. The currents were confirmed to be carried by voltage-gated calcium channels by blocking with  $\text{Co}^{2+}$  (thick lines represent averages of 3-4 traces). (B) Current-voltage (IV, mean  $\pm$  s.e.m.) curves of knockout and wild type. The dip at -50 mV could be indicative of T-Type channel activation. There was no significant difference in fitted IV curves half-maximal activation, peak, slope or reversal potential. (C, D) The maximal current amplitude to a 0 mV step was the same in knockout and wild type cells, as seen in the averaged traces (C, mean  $\pm$  s.d.) and in the quantification of the maximal current density (D, dots = individual cells, horizontal line = mean). (E) Both wild type and knockout do not show voltage-dependent inactivation. Inactivation steps from -60 to +20 mV lasted 400 ms followed by a 50 ms test step to 0 mV. Current difference between beginning and end of the inactivation steps and current during the 0 mV step were compared and no significant differences between genotypes were found.

## 6. Electroretinography (ERG) shows normal outer retina function

To assess functionality of synaptic transmission in the outer retina, we performed ERG recordings *in vivo* (n = 4 knockout, n = 5 wild type animals).

Under dark-adapted (scotopic) conditions (Fig. 7 A), the initial part of the first negative deflection after a light flash (a-wave) is evoked mainly by the rod photoreceptors, whereas the following positive deflection (b-wave) reflects inner retinal activity, including depolarizing (ON) bipolar cells. Note that under scotopic conditions, from  $10^{-2}$  cd\*s/m<sup>2</sup> onward (arrow in Fig. 7 A), cones also get activated. Under light-adapted (photopic) conditions (Fig. 7 B) the b-wave relies on activity driven by the cone system, with the rod system being saturated by the background illumination. Scotopic single-flash ERG recorded from  $\alpha_2\delta$ -3 knockout mice did not show significantly different b-wave amplitudes or latencies from those in wild type animals (Fig. 7 C). There were also no differences in the b-wave amplitudes or latencies of photopic single-flash ERG responses of  $\alpha_2\delta$ -3 knockout and wild type mice (Fig. 7 D).

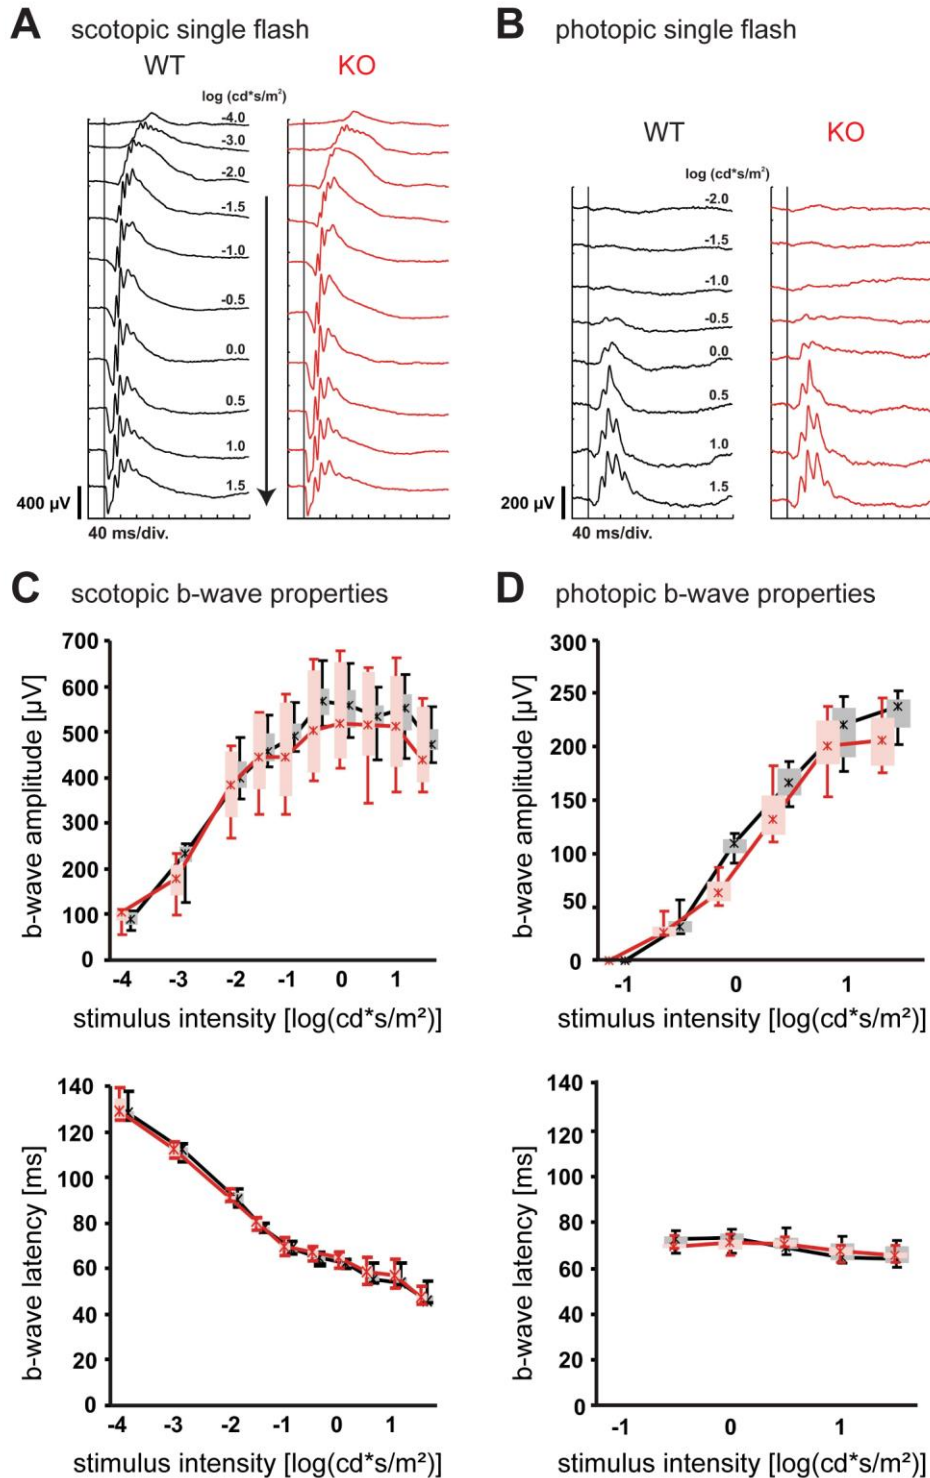

**Figure 7: ERG *in vivo* functional analysis.** (A) Representative single-flash ERG intensity series of wild type (black) and knockout mice (red) under scotopic conditions (arrow indicates intensities with cone activation) and (B) under photopic conditions. (C) Box-and-whisker plots showing single-flash b-wave amplitudes and b-wave latencies under scotopic conditions and (D) under photopic conditions of wild type and knockout mice. Asterisks = medians, connected by solid lines; boxes = 25% to 75% quantile range; whiskers = 5% and 95% quantiles.

## **7. Multi-electrode array (MEA) recordings from retinal ganglion cells reveal several subtle phenotypes of the $\alpha_2\delta$ -3 knockout retina**

In order to investigate perturbances of retinal processing and possible effects downstream of bipolar cells, we isolated retinas from wild type and knockout mice and recorded the activity of retinal ganglion cells with micro-electrode arrays (MEAs). During the recording, light stimuli were presented that covered scotopic, mesopic, and photopic intensity levels (see methods). The same set of stimuli was presented twice at each ambient luminance level. A legend of the presented stimuli is shown at the bottom of Fig. 8 A.

### *Spontaneous activity*

Spontaneous activity was determined as the spike rates during the first second of each stimulus, during which a uniform gray ('128') background was always presented. Note, that due to the short times between stimuli in our experiments (around 3 seconds), the spontaneous activity preceding a stimulus might still be influenced by the previous stimulus. Spontaneous spiking was highest during scotopic ambient luminance and decreased over the time course of the experiment in ON cells (Fig. 8 A, top) and less so in OFF cells (Fig. 8 A, bottom). ON cells had different spontaneous spike rates in wild type and knockout retina mostly during mesopic ambient luminance (Fig. 8 A, upper panel, statistical significance indicated on top with bars of different heights, Wilcoxon ranksum tests; KO: n = 71, WT: n = 97 cells). Interestingly, OFF ganglion cells in knockout retina had a markedly higher spontaneous spike rate than in wild type retina over most of the time course of the experiment (Fig. 8 A, lower panel; KO: n = 63, WT: n = 72 cells).



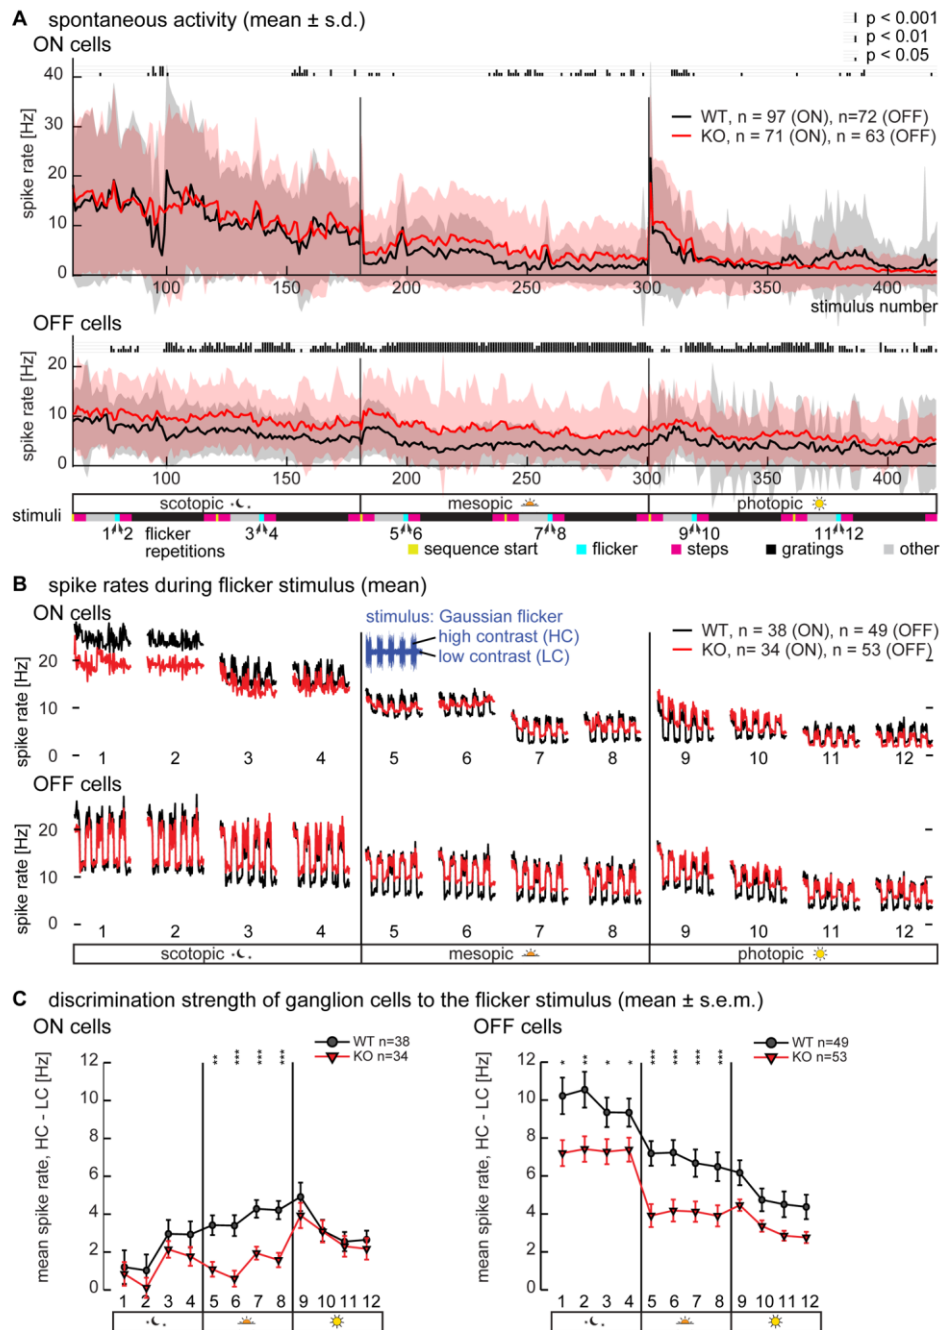

**Figure 8: Multi-electrode array recordings of ganglion cell spontaneous activity and responses to Gaussian white noise flicker.** Ganglion cell activity was recorded with multi-electrode arrays while the retina was exposed to a sequence of visual stimuli, repeated at each ambient luminance level. Each visual stimulus was preceded by 1 second of uniform background gray ('128'). This time window was used to calculate spontaneous activity. **(A)** Spontaneous activity in ON and OFF ganglion cells (polarities defined by STA) over the whole experiment (stimulus durations were 12 seconds to 3 minutes; stimuli 1 to 60 were considered as "settling down period" and not analyzed). ON cell spontaneous activity (upper panel) differed mainly during mesopic conditions while OFF cells (lower panel) in knockout exhibited an increased spontaneous spike rate over all luminance levels (height of the vertical bars on top of the panels indicates p-values). Vertical lines indicate switches to the next ambient luminance level. Stimuli are indicated below: Yellow – sequence start, magenta – full field steps, cyan – Gaussian white noise flicker, black – drifting gratings, gray – other.

**(B)** Mean spike rates during the full-field Gaussian white noise flicker stimulus with interleaved high-contrast (HC) and low-contrast (LC) episodes. For Gaussian flicker, only cells with a clear STA to LC episodes of at least one stimulus repetition per luminance level were analysed. In general, spike rates during HC episodes were similar between genotypes, while spike rates during LC episodes were higher in knockout ON and OFF ganglion cells. **(C)** The difference in spike rate between HC and LC episodes was calculated as a measure of discrimination strength of the contrast modulation. ON cells (left panel) showed a clear difference in discrimination strength only during mesopic conditions, while OFF cells (right panel) had significantly different discrimination strength during mesopic and scotopic conditions.

#### *Gaussian white noise stimulus*

One of our stimuli was a full-field Gaussian white noise (“flicker”) stimulus. Each flicker stimulus consisted of episodes of high-contrast flicker interleaved with episodes of low-contrast flicker (Fig. 8 B). The stimulus was repeated four times at each ambient luminance level, for a total of 12 repetitions (marked 1 through 12 in the legend at the bottom of Fig. 8 A). Spike rates of ganglion cells increased during high-contrast episodes, reflecting the stronger drive by the higher stimulus contrast. During low-contrast episodes, spike rates decreased and dropped to approximately the spontaneous rate before stimulus onset. In both ON and OFF cells, the spike rates during high-contrast seemed more similar between wild type and knockout, than spike rates during low-contrast.

For the analysis, we subtracted the spike rates during low-contrast episodes from the high-contrast spike rates (Fig. 8 C) for each stimulus repetition. We refer to this difference as the discrimination strength of a ganglion cell to the flicker stimulus. We only included cells in the analysis that had a clear spike-triggered average (STA) derived from the low-contrast episodes of at least one stimulus repetition per light level to ensure that the spikes are stimulus-driven (ON cells: KO n = 34; WT n = 38. OFF cells: KO n = 53; WT n = 49). In ON ganglion cells (Fig. 8 C left), we did not observe significant differences between wild type and knockout mice in discrimination strength during scotopic and photopic conditions ( $0.413 < p < 0.992$ ). However, in mesopic conditions the discrimination strength was significantly lower in knockout compared to wild type ( $p < 0.01$  for first,  $p < 0.001$  for other three repetitions). In OFF ganglion cells



(Fig. 8 C right), we observed significantly reduced discrimination strength in knockout during scotopic ( $p = 0.012$ ,  $p = 0.005$ ,  $p = 0.037$ ,  $p = 0.039$ ) and mesopic conditions ( $p < 0.001$ , all repetitions), but not in photopic conditions ( $0.053 < p < 0.487$ ; Wilcoxon ranksum tests).

#### *Drifting sinusoidal grating stimulus*

Looking carefully at the spontaneous activity plots, we observed peculiar jumps in spontaneous activity in ON ganglion cells during drifting sinusoidal grating stimuli in scotopic luminance (Fig. 8 A, top, before stimulus number 100 and after stimulus 150). To investigate this further, we grouped ganglion cells based on their spontaneous activity following sinusoidal grating stimuli in scotopic luminance (Fig. 9 A). We clustered the ganglion cells by a k-means algorithm (Matlab) to avoid any subjective selection bias. Most clusters were approximately equally populated by wild type and knockout cells. However, we found two clusters that were populated mostly by either wild type cells (cluster 4) or by knockout cells (cluster 8), and both exhibited a clear jump in spontaneous activity in scotopic luminance. These two clusters robustly emerged when running the k-means algorithm with a value of  $k$  (= number of clusters) between 7 and 12. Fig. 9 A shows the distribution for  $k = 8$  clusters. Four clusters consisted exclusively of ON cells (1, 4, 5, 8), while the other four clusters were mixed. While both clusters 4 and 8 exhibited a jump in spontaneous activity, this jump happened after presentation of gratings of different spatial properties. This is evident in the spontaneous activities of the individual cells of clusters 4 and 8 during scotopic luminance shown in Fig. 9 B. Spike rates decreased after the presentation of gratings with low spatial periods, sometimes exhibiting a marked drop. Common to all cells in clusters 4 and 8 was a sharp increase in spontaneous spike rate: in cluster 8, this increase happened after presentation of the first  $2000 \mu\text{m}$  grating, while cluster 4 shows a similar jump in spontaneous activity in between the  $500 \mu\text{m}$  and  $1000 \mu\text{m}$  gratings. In both clusters the increased spontaneous activity was maintained between presentations of the gratings with large spatial periods and only occurred in scotopic

luminance. A natural question is, whether the change in spontaneous activity after the presentation of certain gratings simply reflects a persisting elevated activity of the cells during those gratings, i.e. if our observation can be explained by a lingering effect of responses to the stimulus itself. Fig. 9 C shows example responses after aligning (phase shifting) these responses by cross-correlation with the sinusoidal grating stimulus (phase-shifts in responses of different ganglion cells stem from different receptive field positions relative to the grating stimulus). Of cluster 4, only wild type cells were considered for further analysis. We averaged spike rates of cells within each cluster and determined the following response parameters with or without subtracting the spontaneous spike rate (baseline): minimal spike rate, maximal spike rate, mean spike rate, median spike rate and response amplitude (max-min). We compared the parameters of gratings of the same temporal frequency, but with different spatial periods. Fig. 9 D plots significant changes in a heatmap (Wilcoxon ranksum test). For example, the top left entry indicates the level of significance when comparing the presentations of 0.25 Hz gratings with 100 versus 200  $\mu\text{m}$  spatial periods. Of all parameters examined, only the baseline-subtracted mean spike rate yielded significant differences between gratings of different spatial properties in the range with a change in the spontaneous spike rate (Fig. 9 D, left; spatial period range marked with yellow rectangle). In all other parameters, only the strong changes between 200  $\mu\text{m}$  and 500  $\mu\text{m}$  gratings yielded systematically significant differences, shown here for the parameter “amplitude” of clusters 4 and 8 (Fig. 9 D, right). The situation was similar for all eight clusters (not shown). In summary, the change of spontaneous activity after the presentation of certain gratings is hardly reflected by changed response properties to the gratings themselves.

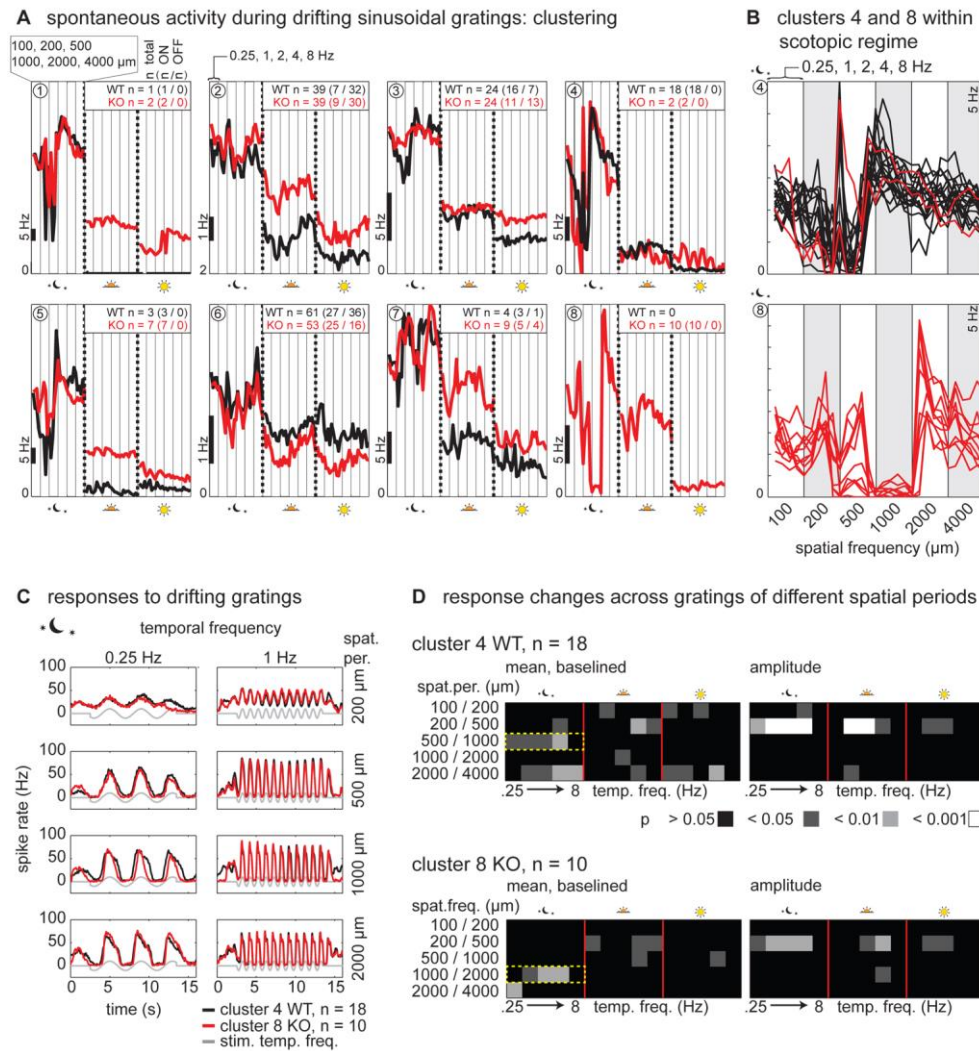

**Figure 9: Multi-electrode array recordings of ganglion cell responses to drifting sinusoidal gratings.** Ganglion cells were k-means-clustered based on their spontaneous activity following sinusoidal grating stimuli in scotopic luminance. **(A)** Mean spontaneous activity of eight ganglion cell clusters. Four clusters were exclusively ON cells (1, 4, 5, 8), while the other four clusters were mixed (n numbers: total (ON cells/OFF cells)). Most clusters contained wild type and knockout ganglion cells, only clusters 4 and 8 were more specific. Columns mark spatial periods, each containing all temporal frequencies (see labels above clusters 1 and 2). Vertical dotted lines indicate the next luminance level. **(B)** Spontaneous activity of individual cells of clusters 4 (top) and 8 (bottom) during scotopic luminance. Spike rates decreased during the low spatial periods, with a sharp increase during 500  $\mu\text{m}$  gratings (cluster 4) or after the presentation of the 2000  $\mu\text{m}$  gratings (cluster 8). **(C)** Averaged response of cluster 4 (WT only) and cluster 8 to a subset of grating stimuli. There is a marked increase in spike rate modulation (amplitude) in the responses to the 500  $\mu\text{m}$  gratings compared to the 200  $\mu\text{m}$  gratings. **(D)** Only the baselined mean spike rate (left panels) differed significantly at the junctions of grating spatial periods where we saw spontaneous activity jumps (yellow rectangles). Amplitudes (right panels) showed significant differences mainly at the junction between 200  $\mu\text{m}$  and 500  $\mu\text{m}$  gratings.

### *Full-field step stimulus*

We next analyzed the responses to a full-field contrast step stimulus. The averaged responses were very similar in OFF ganglion cells from wild type and knockout at all three luminance levels (Fig. 10 A). Only subtle differences between genotypes in the positive contrast steps (going 'brighter') at scotopic and mesopic luminance could be observed. In OFF ganglion cells of the knockout, response peaks were partly shifted in time (arrows) and response amplitudes were increased (arrowheads). Note that classical ON-OFF cells would almost unequivocally fall into the OFF category in our classification by their STA polarity (Tikidji-Hamburyan et al., 2014).

ON cells of wild type and knockout also responded very similarly in mesopic and photopic luminance levels (Fig. 10 B). However, in scotopic luminance, upon return to the grey background after the white step, we observed different delays in response peaks. The averaged responses revealed that there are several subpopulations with different properties, as it appears from the peaks of the standard deviations of the responses (inset). To investigate this further, subpopulations of cells were defined by manually classifying response peaks in five time windows after the offset of the white flash: 0.2 – 0.5 s, 0.5 – 1.0 s, 1.0 – 1.3 s, 1.3 – 1.5 s and 1.5 – 1.75 s. This yielded a differential distribution pattern in wild type and knockout (bar graph in Fig. 10 B). 75% of ON cells in knockout had such responses versus 45% of the wild type cells. Strikingly, almost all wild type cells with a response fell into subpopulation '2' (response peak between 0.5 and 1 s). Subpopulation '3' (1 to 1.3 s) was almost exclusively found in knockout retinas. Fig. 10 C and E illustrates the marked timing difference in these responses with two representative cells belonging to subpopulations '2' and '3' (spike raster on top, spike rate at the bottom). Fig. 10 D and F show the population averages of these two populations.

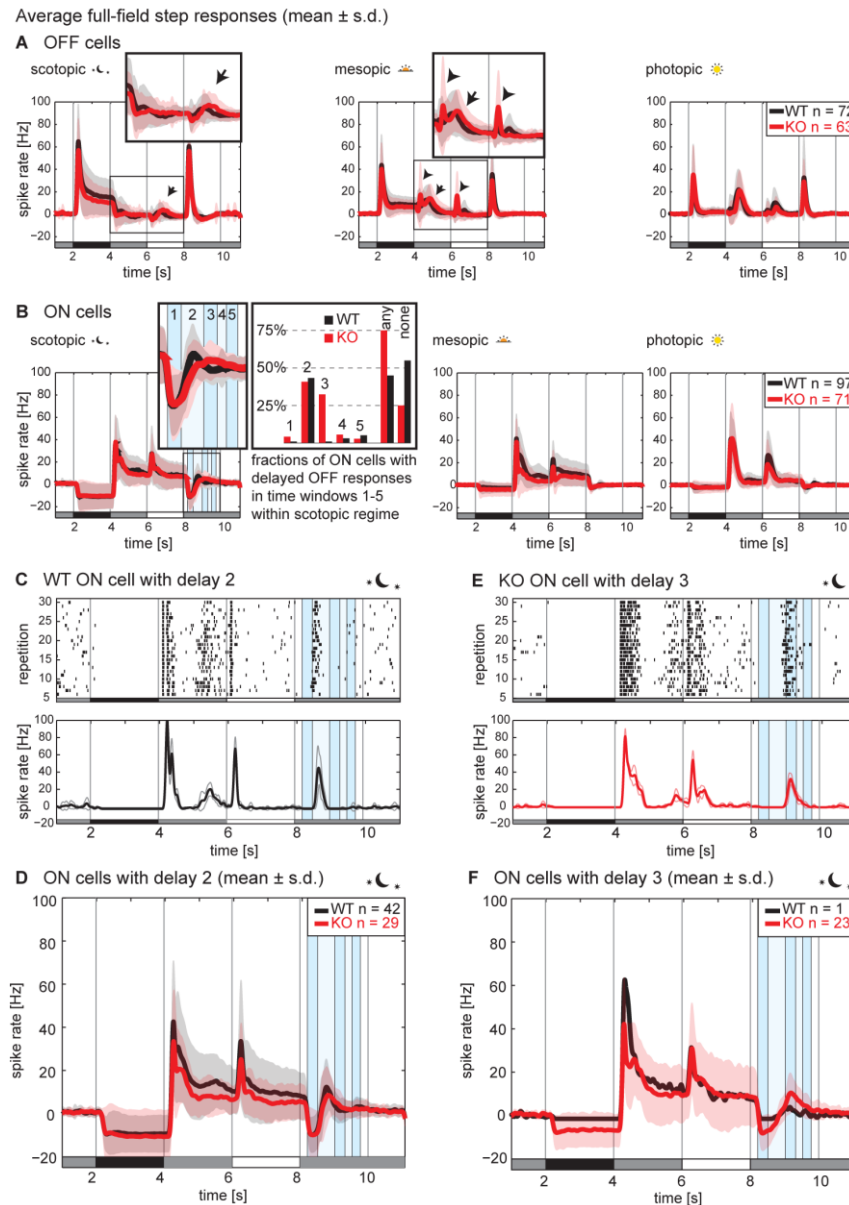

**Figure 10: Multi-electrode array recordings of ganglion cell responses to full-field contrast steps.** Ganglion cells were stimulated with full-field steps: gray  $\rightarrow$  black  $\rightarrow$  gray  $\rightarrow$  white  $\rightarrow$  gray (see bottom of each panel). **(A)** Averaged responses (mean  $\pm$  s.d.) of OFF cells from wild type and knockout at all three luminance levels. Response peaks to anti-preferred contrast steps were partly delayed (arrows) and response amplitudes were increased (arrowheads) in scotopic and mesopic luminance. **(B)** Responses of ON cells of wild type and knockout were very similar in mesopic and photopic luminance levels. In scotopic luminance, responses to the last step were delayed. We observed several subpopulations characterized by the delay timings (see standard deviations in inset). Subpopulations were similar in wild type and knockout, except for cells with a delayed response in time window 3, which was almost exclusively found in knockout (bar graph). **(C)** Example scotopic response of a WT ON cell with delay 2 (top: raster plot of all 30 repetitions; bottom: averaged spike rate; thick line = mean, thin lines = s.d.). **(D)** Averaged scotopic response of all cells with a delayed response in time window 2 (mean  $\pm$  s.d.). **(E)** Example scotopic response of a KO ON cell with delay 3 (top: raster plot of all 30 repetitions; bottom: averaged spike rate; thick line = mean, thin lines = s.d.). **(F)** Averaged scotopic response of all cells with a delayed response in time window 3 (mean  $\pm$  s.d.).

## Discussion

We found especially strong expression of the voltage-gated calcium channel (VGCC) subunit  $\alpha_2\delta$ -3 in horizontal cells in the mouse retina. Yet, a knockout of  $\alpha_2\delta$ -3 did not lead to changes of the horizontal cell mosaic or of voltage-gated calcium channel currents within horizontal cell somata. Outer retinal function measured by electroretinograms was normal, as was the optokinetic reflex behavior in  $\alpha_2\delta$ -3 knockout animals. In ganglion cells however, we could see a number of changes in response properties to different kinds of visual stimuli, which were mostly restricted to scotopic or mesopic ambient luminance levels of our stimulation paradigm.

### *$\alpha_2\delta$ mRNA expression*

Gene or protein expression of  $\alpha_2\delta$ -1 (Eroglu et al., 2009; Huang et al., 2013),  $\alpha_2\delta$ -3 (Nakajima et al., 2009; Pérez de Sevilla Müller et al., 2015) and  $\alpha_2\delta$ -4 (Wycisk et al., 2006; Mercer et al., 2011; de Sevilla Muller et al., 2013; Thoreson et al., 2013) have been reported in vertebrate retina. To the best of our knowledge, expression of  $\alpha_2\delta$ -2 in adult retina, or expression of any of the four  $\alpha_2\delta$  subunits during mouse retinal development have not been demonstrated. We found expression of all  $\alpha_2\delta$  genes in adult as well as in developing mouse retina, from at least postnatal day 3 onwards (Fig. 2). This raises the possibility for a function of the  $\alpha_2\delta$  subunits in synaptogenesis (Kurshan et al., 2009) in mouse retina during development.

### *$\alpha_2\delta$ -3 localization*

It has previously been reported that  $\alpha_2\delta$ -3 is expressed in ON bipolar cells (Nakajima et al., 2009), photoreceptors, bipolar, amacrine and ganglion cells but not horizontal cells (Pérez de Sevilla Müller et al., 2015). Yet, we found very prominent LacZ staining in horizontal cells, driven by the endogenous  $\alpha_2\delta$ -3 promoter (Fig. 3). The extraordinary strength of the horizontal cell labeling by the LacZ reporter we observed is completely



in line with the  $\alpha_2\delta$ -3 gene expression values found in the microarray data of Siegert et al. (2012) (the expression profile can be found online by selecting “*Cacna2d3*” at <http://www.fmi.ch/roska.data/index.php>). Therefore we believe that the clear antibody labeling of  $\alpha_2\delta$ -3 protein in the outer plexiform layer that has been reported by Pérez de Sevilla Müller et al. (2015) stems at least in large part from horizontal cells. The absence of this labeling from cone pedicles would thus suggest localization of  $\alpha_2\delta$ -3 only in horizontal cell processes contacting rods. The data of Siegert et al. (2012) also supports our finding of LacZ reporter labelling in melanopsin ganglion cells (Fig. 4). Interestingly, their microarray data shows expression of  $\alpha_2\delta$ -3 also in A-II and maybe other glycinergic amacrine cells, which was also reported by Pérez de Sevilla Müller et al. (2015). This would be consistent with our observation of LacZ labeling in the proximal INL (Fig. 3+4).

#### *Retina morphology and the horizontal cell mosaic*

The mouse retina only contains one type of horizontal cell of the axon-bearing b-type (Peichl and Gonzalez-Soriano, 1994) which form a regular mosaic (Wassle and Riemann, 1978). Mosaic formation is at least in part controlled by repulsive homotypic interactions between neighboring horizontal cells (Poche et al., 2008; Huckfeldt et al., 2009). It has been shown that  $\alpha_2\delta$  subunits have a function in synaptogenesis and synaptic stabilization (Eroglu et al., 2009). The unperturbed regularity of the mosaic and spacing of horizontal cells (Fig. 5) can be interpreted as an indication of normal outer retinal development and suggests no impact on horizontal cell survival by the  $\alpha_2\delta$ -3 knockout. However, the connectivity and ultra-structure of the triad synapses should be investigated more closely to determine potential effects on synaptogenesis (Reese et al., 2005) and horizontal cell connectivity in detail.

### *Voltage-gated calcium channel currents in horizontal cell somata*

The  $\alpha_2\delta$  subunits are thought to enhance trafficking of VGCC to the membrane. Yet we could not detect a difference in maximum current amplitude or density in horizontal cell somata of  $\alpha_2\delta$ -3 knockout nor in the parameters of the current-voltage relationships or the voltage-dependent inactivation (Fig. 6). It is unknown whether  $\alpha_2\delta$ -3 interacts with all VGCC  $\alpha_1$  subunits of horizontal cells, namely L-, P/Q- and N-Type (Schubert et al., 2006; Liu et al., 2013). It is also not known if there is more than one  $\alpha_2\delta$  isoform expressed in horizontal cells. Differential regulation of either  $\alpha_1$  or  $\alpha_2\delta$  subunits could compensate for the knockout of  $\alpha_2\delta$ -3, rescuing horizontal cells from having a pronounced change in voltage-gated calcium channel properties. The other intriguing possibility is the putative localization of  $\alpha_2\delta$ -3 on the rod-contacting axonal processes. Any changes on calcium currents in the axonal compartment would likely not show up in our somatic recordings.

### *Outer retina function and visual reflex behavior*

Horizontal cells form reciprocal synapses with photoreceptors and this feedback is thought to influence spatial (Thoreson and Mangel, 2012; Szikra et al., 2014) as well as temporal processing properties of the retina (Pandarinath et al., 2010). If the  $\alpha_2\delta$ -3 knockout had an impact on feedback, it could affect the strength or kinetics of synaptic transmission from photoreceptors also to bipolar cells, and be reflected in the properties of bipolar cell responses. Our electroretinographic (ERG) recordings did not show an effect of the  $\alpha_2\delta$ -3 knockout on latencies or amplitudes of the b-wave (indicative of depolarizing bipolar cell activation), in neither scotopic nor photopic conditions (Fig. 7). These results indicate that  $\alpha_2\delta$ -3 subunits are not essential for photoreceptor responses or the synaptic signal transmission to depolarizing bipolar cells.

As a measure for overall retinal functionality we tested the  $\alpha_2\delta$ -3 knockout animals for their optokinetic reflex behavior. Tracking behavior in our virtual optokinetic drum



experiments was found in most knockout animals (Fig. 1), underlining general retinal functionality and suggesting meaningful output of  $\alpha_2\delta$ -3 knockout retina in this simple visual reflex paradigm.

### *Retinal processing*

Our micro-electrode array (MEA) recordings of retinal ganglion cells revealed several subtle differences between wild type and  $\alpha_2\delta$ -3 knockout retina. Some of the effects appear rather general, such as the average spontaneous spike rate which was elevated throughout the experiment (covering all luminance levels) in OFF ganglion cells, but not in ON cells (Fig. 8 A). The compression of discrimination strength between high- and low-contrast flicker stimuli (Fig. 8 B+C) was restricted to scotopic (ON cells) or scotopic and mesopic luminance levels (OFF cells). This compression seemed to be caused mainly by an elevation of spike rates to the low contrast-condition, while the spike rates during high contrast were largely similar. The restriction of effects to lower luminance levels was a feature we observed consistently.

While OFF cells showed only minor differences in our other stimuli (Fig. 10 A), there were subsets of ON cells with changed response profiles which we found only in  $\alpha_2\delta$ -3 knockout retinas. We saw a jump in spontaneous spike rates during drifting grating stimuli in both wild type and knockout ON cells, reflecting changed activity after grating stimuli of certain spatial properties. However, these jumps occurred after gratings of different spatial properties in wild type and knockout ganglion cells. It is tempting to speculate that the two clusters of cells with an abrupt change in spontaneous spike rates (Fig. 9 B) reflect a change in spatial processing of the involved circuitry. We do not know, however, what brought about this change in spontaneous spike rates, as responses to the preceding grating stimuli themselves did not show any abrupt changes in both clusters. The only difference we found (a change in baseline-adjusted mean spike rates, Fig. 9 D) is likely due to the shift in the spontaneous spike rate itself, as this determines the baseline value and did not show in the non-baselined data (not

shown). We didn't observe any systematic differences depending on the temporal properties of the grating stimuli we used.

The responses within different time windows of our full-field step stimuli (Fig. 10 B), on the other hand, can be seen as a change of temporal properties. We do not know the physiological significance of these responses, as they only appear on the return to the background mean luminance and most have a very long temporal scale (> 500 ms). We refer to this type of responses as delayed responses. In general, we found delayed responses to be much more abundant in ganglion cells of knockout retina. This could indicate an emergence of this kind of responses in ganglion cells, rather than a shift in the delay time in the same ganglion cell types. It could also indicate a different distribution of the abundance of single ganglion cell types in the knockout, as we cannot rule out sampling artifacts of the MEA technique, i.e. we likely record from different numbers of single ganglion cell types in each recording.

What could cause the differences in retinal ganglion cell responses which we described? Due to the widespread expression of  $\alpha_2\delta-3$  in various cell types, interpretation of the found phenotypes has to be undertaken with care. As a subunit of voltage-gated calcium channels, the  $\alpha_2\delta-3$  knockout is most likely to cause a loss-of-function kind of phenotype, affecting synaptic release in the respective cells. The increased spontaneous spike rate in OFF ganglion cells might be caused by reduced inhibitory transmission somewhere in the circuitry. It is unlikely that the compression of discrimination strength in our Gaussian white noise stimulus was caused by the  $\alpha_2\delta-3$  knockout in horizontal cells, since horizontal cells do not play a role in contrast gain control (Beaudoin et al., 2007) or contrast adaptation (Baccus and Meister, 2002). The shift in spontaneous spike rate during drifting sinusoidal gratings of certain spatial properties could be indicative of a change in receptive field size in one or several cell types. Finally, the abundance of delayed responses and their delay timings in our full-field step stimuli might be caused by a prolonged inhibitory input or by a change in the interaction between the ON and OFF pathways. It is also possible that some of the

changes are caused by ganglion cell-intrinsic mechanisms, since  $\alpha_2\delta$ -3 expression in the ganglion cell layer seemed low but was widespread. Interestingly, the majority of changes we observed were restricted to brightness regimes with rod activity (scotopic and mesopic), raising the possibility of a role of  $\alpha_2\delta$ -3 in retinal circuitries carrying rod signals.

#### *Horizontal cell function of $\alpha_2\delta$ -3 and other possible mechanisms*

It remains open how  $\alpha_2\delta$ -3 acts within VGCC complexes in horizontal cells and if it contributes to feedback from horizontal cells to photoreceptors (Thoreson and Mangel, 2012). Horizontal cells have two functionally separated cellular compartments that were thought to be electrically isolated from each other (Nelson et al., 1975): somato-dendritic processes contact cone pedicles, axonal arborizations contact rod spherules (Kolb, 1970, 1974). Signals can, however, spread from the dendritic compartment down this axon and impact the rod circuitry (Trumpler et al., 2008), creating a form of surround inhibition by sign-inverting activation of rod synapses (Szikra et al., 2014). Localization of  $\alpha_2\delta$ -3 within the axonal compartment of horizontal cells could at least in part explain the restriction of the phenotypes we found in our MEA recordings to scotopic and mesopic regimes. Horizontal cells might thus also influence the balance between rod and cone activity by utilizing different molecular machinery for feedback in each compartment, involving  $\alpha_2\delta$ -3 (rods) or not involving  $\alpha_2\delta$ -3 (cones).

Considering a putative disturbance of the rod circuitry, A-II amacrine cells would also be a good candidate for some of the changes we observed in non-photopic regimes. Indeed, glycinergic amacrine cells were reported to express  $\alpha_2\delta$ -3 (Siegert et al., 2012; Pérez de Sevilla Müller et al., 2015).

A cell type-specific knockout of  $\alpha_2\delta$ -3 in horizontal cells or A-II amacrine cells would help to elucidate the specific effects of this isoform in certain aspects of retinal processing. Especially the possible role of  $\alpha_2\delta$ -3 in horizontal cell feedback to rods versus feedback to cones could be interesting to investigate.

**Acknowledgements:** The authors thank Sebastian Ströh and Karin Dedek for the introduction to isolated horizontal cell patch-clamp techniques, Nadine Ortner for support on fitting IV curves and Jutta Engel and Timm Schubert for fruitful discussions.

### **Role of authors**

Designed study: HS, AP, MS, TAM. Performed Experiments: HS, VS, BB, MGG.

Analyzed data: HS, VS, BB, ATH, MGG. Wrote paper: HS, VS, BB, TAM.

### **Literature cited**

Abdeljalil J, Hamid M, Abdel-Mouttalib O, Stephane R, Raymond R, Johan A, Jose S, Pierre C, Serge P. 2005. The optomotor response: a robust first-line visual screening method for mice. *Vis Res* 45:1439–1446.

Airaksinen MS, Eilers J, Garaschuk O, Thoenen H, Konnerth A, Meyer M. 1997. Ataxia and altered dendritic calcium signaling in mice carrying a targeted null mutation of the calbindin D28k gene. *Proc Natl Acad Sci U S A* 94:1488–93.

Baccus SA, Meister M. 2002. Fast and slow contrast adaptation in retinal circuitry. *Neuron* 36:909–19.

Ball SL, Powers PA, Shin HS, Morgans CW, Peachey NS, Gregg RG. 2002. Role of the beta(2) subunit of voltage-dependent calcium channels in the retinal outer plexiform layer. *Invest Ophthalmol Vis Sci* 43:1595–1603.

Barry PH. 1994. JPCalc, a software package for calculating liquid junction potential corrections in patch-clamp, intracellular, epithelial and bilayer measurements and for correcting junction potential measurements. *J Neurosci Methods* 51:107–16.

Beaudoin DL, Borghuis BG, Demb JB. 2007. Cellular basis for contrast gain control over the receptive field center of mammalian retinal ganglion cells. *J Neurosci* 27:2636–45.

Benkner B, Mutter M, Ecke G, Münch T a. 2013. Characterizing visual performance in mice: an objective and automated system based on the optokinetic reflex. *Behav Neurosci* 127:788–96.

Catterall W a, Perez-Reyes E, Snutch TP, Striessnig J. 2005. International Union of Pharmacology. XLVIII. Nomenclature and structure-function relationships of voltage-gated calcium channels. *Pharmacol Rev* 57:411–425.

Celio MR, Baier W, Schärer L, Gregersen HJ, de Viragh PA, Norman AW. 1990. Monoclonal antibodies directed against the calcium binding protein Calbindin D-28k. *Cell Calcium* 11:599–602.

- Chichilnisky EJ. 2001. A simple white noise analysis of neuronal light responses. *Network* 12:199–213.
- Curtis BM, Catterall WA. 1984. Purification of the calcium antagonist receptor of the voltage-sensitive calcium channel from skeletal muscle transverse tubules. *Biochemistry* 23:2113–2118.
- Davies A, Hendrich J, Van Minh AT, Wratten J, Douglas L, Dolphin AC. 2007. Functional biology of the alpha(2)delta subunits of voltage-gated calcium channels. *Trends Pharmacol Sci* 28:220–228.
- Davies A, Kadurin I, Alvarez-Laviada A, Douglas L, Nieto-Rostro M, Bauer CS, Pratt WS, Dolphin AC. 2010. The alpha2delta subunits of voltage-gated calcium channels form GPI-anchored proteins, a posttranslational modification essential for function. *Proc Natl Acad Sci U S A* 107:1654–1659.
- Dolphin AC. 2012. Calcium channel auxiliary alpha2delta and beta subunits: trafficking and one step beyond. *Nat Rev Neurosci* 13:542–555.
- Ellis SB, Williams ME, Ways NR, Brenner R, Sharp AH, Leung AT, Campbell KP, McKenna E, Koch WJ, Hui A, et al. 1988. Sequence and expression of mRNAs encoding the alpha 1 and alpha 2 subunits of a DHP-sensitive calcium channel. *Science* (80- ) 241:1661–1664.
- Eroglu C, Allen NJ, Susman MW, O'Rourke NA, Park CY, Ozkan E, Chakraborty C, Mulinyawe SB, Annis DS, Huberman AD, Green EM, Lawler J, Dolmetsch R, Garcia KC, Smith SJ, Luo ZD, Rosenthal A, Mosher DF, Barres BA. 2009. Gabapentin receptor alpha2delta-1 is a neuronal thrombospondin receptor responsible for excitatory CNS synaptogenesis. *Cell* 139:380–392.
- Göz D, Studholme K, Lappi DA, Rollag MD, Provencio I, Morin LP. 2008. Targeted destruction of photosensitive retinal ganglion cells with a saporin conjugate alters the effects of light on mouse circadian rhythms. *PLoS One* 3:e3153.
- Guo C, Stella Jr. SL, Hirano AA, Brecha NC. 2009. Plasmalemmal and vesicular gamma-aminobutyric acid transporter expression in the developing mouse retina. *J Comp Neurol* 512:6–26.
- Gurnett CA, Felix R, Campbell KP. 1997. Extracellular interaction of the voltage-dependent Ca<sup>2+</sup> channel alpha2delta and alpha1 subunits. *J Biol Chem* 272:18508–18512.
- Haverkamp S, Specht D, Majumdar S, Zaidi NF, Brandstätter JH, Wasco W, Wässle H, Tom Dieck S. 2008. Type 4 OFF cone bipolar cells of the mouse retina express calsenilin and contact cones as well as rods. *J Comp Neurol* 507:1087–101.
- Haverkamp S, Wässle H. 2000. Immunocytochemical analysis of the mouse retina. *J Comp Neurol* 23:1–23.
- Huang J, Zhou L, Wang H, Luo J, Zeng L, Xiong K, Chen D. 2013. Distribution of thrombospondins and their neuronal receptor alpha2delta1 in the rat retina. *Exp Eye Res* 111C:36–49.

Huckfeldt RM, Schubert T, Morgan JL, Godinho L, Di Cristo G, Huang ZJ, Wong RO. 2009. Transient neurites of retinal horizontal cells exhibit columnar tiling via homotypic interactions. *Nat Neurosci* 12:35–43.

Janssen-Bienhold U, Trumpler J, Hilgen G, Schultz K, Muller LP, Sonntag S, Dedek K, Dirks P, Willecke K, Weiler R. 2009. Connexin57 is expressed in dendro-dendritic and axo-axonal gap junctions of mouse horizontal cells and its distribution is modulated by light. *J Comp Neurol* 513:363–374.

Klugbauer N, Lacinova L, Marais E, Hobom M, Hofmann F. 1999. Molecular diversity of the calcium channel  $\alpha 2\delta$  subunit. *J Neurosci* 19:684–691.

Kolb H. 1970. Organization of the outer plexiform layer of the primate retina: electron microscopy of Golgi-impregnated cells. *Philos Trans R Soc Lond B Biol Sci* 258:261–83.

Kolb H. 1974. The connections between horizontal cells and photoreceptors in the retina of the cat: electron microscopy of Golgi preparations. *J Comp Neurol* 155:1–14.

Kurshan PT, Oztan A, Schwarz TL. 2009. Presynaptic  $\alpha 2\delta$ -3 is required for synaptic morphogenesis independent of its  $\text{Ca}^{2+}$ -channel functions. *Nat Neurosci* 12:1415–1423.

Lagali PS, Balya D, Awatramani GB, Munch TA, Kim DS, Buskamp V, Cepko CL, Roska B. 2008. Light-activated channels targeted to ON bipolar cells restore visual function in retinal degeneration. *Nat Neurosci* 11:667–675.

Leung AT, Imagawa T, Campbell KP. 1987. Structural characterization of the 1,4-dihydropyridine receptor of the voltage-dependent  $\text{Ca}^{2+}$  channel from rabbit skeletal muscle. Evidence for two distinct high molecular weight subunits. *J Biol Chem* 262:7943–7946.

Liu X, Hirano AA, Sun X, Brecha NC, Barnes S. 2013. Calcium channels in rat horizontal cells regulate feedback inhibition of photoreceptors through an unconventional GABA- and pH-sensitive mechanism. *J Physiol* 591:3309–24.

Mandadi S, Hong P, Tran MA, Bráz JM, Colarusso P, Basbaum AI, Whelan PJ. 2013. Identification of multisegmental nociceptive afferents that modulate locomotor circuits in the neonatal mouse spinal cord. *J Comp Neurol* 521:2870–87.

Mercer AJ, Chen M, Thoreson WB. 2011. Lateral mobility of presynaptic L-type calcium channels at photoreceptor ribbon synapses. *J Neurosci* 31:4397–406.

Mitchiner JC, Pinto LH, Venable Jr. JW. 1976. Visually evoked eye movements in the mouse (*Mus musculus*). *Vis Res* 16:1169–1171.

Morgans CW. 2001. Localization of the  $\alpha(1F)$  calcium channel subunit in the rat retina. *Invest Ophthalmol Vis Sci* 42:2414–2418.

Munch TA, da Silveira RA, Siegert S, Viney TJ, Awatramani GB, Roska B. 2009. Approach sensitivity in the retina processed by a multifunctional neural circuit. *Nat Neurosci* 12:1308–1316.

- Nakajima Y, Moriyama M, Hattori M, Minato N, Nakanishi S. 2009. Isolation of ON bipolar cell genes via hrGFP-coupled cell enrichment using the mGluR6 promoter. *J Biochem* 145:811–818.
- Neely GG, Hess A, Costigan M, Keene AC, Goulas S, Langeslag M, Griffin RS, Belfer I, Dai F, Smith SB, Diatchenko L, Gupta V, Xia CP, Amann S, Kreitz S, Heindl-Erdmann C, Wolz S, Ly C V, Arora S, Sarangi R, Dan D, Novatchkova M, Rosenzweig M, Gibson DG, Truong D, Schramek D, Zoranovic T, Cronin SJ, Angjeli B, Brune K, Dietzl G, Maixner W, Meixner A, Thomas W, Pospisilik JA, Alenius M, Kress M, Subramaniam S, Garrity PA, Bellen HJ, Woolf CJ, Penninger JM. 2010. A genome-wide *Drosophila* screen for heat nociception identifies  $\alpha 2\delta 3$  as an evolutionarily conserved pain gene. *Cell* 143:628–638.
- Nelson R, von Litzow A, Kolb H, Gouras P. 1975. Horizontal cells in cat retina with independent dendritic systems. *Science* 189:137–9.
- Nikonov SS, Daniele LL, Zhu X, Craft CM, Swaroop A, Pugh Jr. EN. 2005. Photoreceptors of *Nrl*  $-/-$  mice coexpress functional S- and M-cone opsins having distinct inactivation mechanisms. *J Gen Physiol* 125:287–304.
- Ortner NJ, Bock G, Vandael DHF, Mauersberger R, Draheim HJ, Gust R, Carbone E, Tuluc P, Striessnig J. 2014. Pyrimidine-2,4,6-triones are a new class of voltage-gated L-type  $Ca^{2+}$  channel activators. *Nat Commun* 5:3897.
- Pandarathna C, Bomash I, Victor JD, Prusky GT, Tschetter WW, Nirenberg S. 2010. A novel mechanism for switching a neural system from one state to another. *Front Comput Neurosci* 4:2.
- Patton C, Thompson S, Epel D. 2004. Some precautions in using chelators to buffer metals in biological solutions. *Cell Calcium* 35:427–431.
- Peichl L, Gonzalez-Soriano J. 1994. Morphological types of horizontal cell in rodent retinae: a comparison of rat, mouse, gerbil, and guinea pig. *Vis Neurosci* 11:501–517.
- Pérez de Sevilla Müller L, Sargoy A, Fernández-Sánchez L, Rodríguez A, Liu J, Cuenca N, Brecha N. 2015. Expression and cellular localization of the voltage-gated calcium channel  $\alpha 2\delta 3$  in the rodent retina. *J Comp Neurol* 523:1443–60.
- Phillips MJ, Otteson DC, Sherry DM. 2010. Progression of neuronal and synaptic remodeling in the rd10 mouse model of retinitis pigmentosa. *J Comp Neurol* 518:2071–89.
- Pirone A, Kurt S, Zuccotti A, Rüttiger L, Pilz P, Brown DH, Franz C, Schweizer M, Rust MB, Rübtsamen R, Friauf E, Knipper M, Engel J. 2014.  $\alpha 2\delta 3$  is essential for normal structure and function of auditory nerve synapses and is a novel candidate for auditory processing disorders. *J Neurosci* 34:434–45.
- Poche RA, Raven MA, Kwan KM, Furuta Y, Behringer RR, Reese BE. 2008. Somal positioning and dendritic growth of horizontal cells are regulated by interactions with homotypic neighbors. *Eur J Neurosci* 27:1607–1614.



- Preibisch S, Saalfeld S, Tomancak P. 2009. Globally optimal stitching of tiled 3D microscopic image acquisitions. *Bioinformatics* 25:1463–1465.
- Qin N, Yagel S, Momplaisir ML, Codd EE, D'Andrea MR. 2002. Molecular cloning and characterization of the human voltage-gated calcium channel alpha(2)delta-4 subunit. *Mol Pharmacol* 62:485–496.
- Reese BE, Raven MA, Stagg SB. 2005. Afferents and homotypic neighbors regulate horizontal cell morphology, connectivity, and retinal coverage. *J Neurosci* 25:2167–2175.
- Reinhard K, Tikidji-Hamburyan A, Seitter H, Idrees S, Mutter M, Benkner B, Münch TA. 2014. Step-by-step instructions for retina recordings with perforated multi electrode arrays. *PLoS One* 9:e106148.
- Robinson P, Etheridge S, Song L, Shah R, Fitzgerald EM, Jones OT. 2011. Targeting of voltage-gated calcium channel alpha2delta-1 subunit to lipid rafts is independent from a GPI-anchoring motif. *PLoS One* 6:e19802.
- Sanyal S, Bal AK. 1973. Comparative light and electron microscopic study of retinal histogenesis in normal and rd mutant mice. *Z Anat Entwicklungsgesch* 142:219–238.
- Schindelin J, Arganda-Carreras I, Frise E, Kaynig V, Longair M, Pietzsch T, Preibisch S, Rueden C, Saalfeld S, Schmid B, Tinevez JY, White DJ, Hartenstein V, Eliceiri K, Tomancak P, Cardona A. 2012. Fiji: an open-source platform for biological-image analysis. *Nat Methods* 9:676–682.
- Schubert T, Weiler R, Feigenspan A. 2006. Intracellular calcium is regulated by different pathways in horizontal cells of the mouse retina. *J Neurophysiol* 96:1278–1292.
- Scott MM, Lachey JL, Sternson SM, Lee CE, Elias CF, Friedman JM, Elmquist JK. 2009. Leptin targets in the mouse brain. *J Comp Neurol* 514:518–32.
- De Sevilla Muller LP, Liu J, Solomon A, Rodriguez A, Brecha N. 2013. Expression of voltage-gated calcium channel alpha(2) delta(4) subunits in the mouse and rat retina. *J Comp Neurol*.
- Shelley J, Dedek K, Schubert T, Feigenspan A, Schultz K, Hombach S, Willecke K, Weiler R. 2006. Horizontal cell receptive fields are reduced in connexin57-deficient mice. *Eur J Neurosci* 23:3176–3186.
- Siegert S, Cabuy E, Scherf BG, Kohler H, Panda S, Le Y-Z, Fehling HJ, Gaidatzis D, Stadler MB, Roska B. 2012. Transcriptional code and disease map for adult retinal cell types. *Nat Neurosci* 15:487–495.
- Szikra T, Trenholm S, Drinnenberg A, Jüttner J, Raics Z, Farrow K, Biel M, Awatramani G, Clark DA, Sahel J-A, da Silveira RA, Roska B. 2014. Rods in daylight act as relay cells for cone-driven horizontal cell-mediated surround inhibition. *Nat Neurosci* 17:1728–35.



- Tanimoto N, Muehlfriedel RL, Fischer MD, Fahl E, Humphries P, Biel M, Seeliger MW. 2009. Vision tests in the mouse: Functional phenotyping with electroretinography. *Front Biosci* 14:2730–2737.
- Thoreson WB, Mangel SC. 2012. Lateral interactions in the outer retina. *Prog Retin Eye Res* 31:407–441.
- Thoreson WB, Mercer AJ, Cork KM, Szalewski RJ. 2013. Lateral mobility of L-type calcium channels in synaptic terminals of retinal bipolar cells. *Mol Vis* 19:16–24.
- Tikidji-Hamburyan A, Reinhard K, Seitter H, Hovhannisyan A, Procyk CA, Allen AE, Schenk M, Lucas RJ, Münch TA. 2014. Retinal output changes qualitatively with every change in ambient illuminance. *Nat Neurosci* 18:66–74.
- Trumpler J, Dedek K, Schubert T, de Sevilla Muller LP, Seeliger M, Humphries P, Biel M, Weiler R. 2008. Rod and cone contributions to horizontal cell light responses in the mouse retina. *J Neurosci* 28:6818–6825.
- Umino Y, Solessio E, Barlow RB. 2008. Speed, spatial, and temporal tuning of rod and cone vision in mouse. *J Neurosci* 28:189–198.
- Wassle H, Riemann HJ. 1978. The mosaic of nerve cells in the mammalian retina. *Proc R Soc L B Biol Sci* 200:441–461.
- Wycisk KA, Budde B, Feil S, Skosyrski S, Buzzi F, Neidhardt J, Glaus E, Nurnberg P, Ruether K, Berger W. 2006. Structural and functional abnormalities of retinal ribbon synapses due to *Cacna2d4* mutation. *Invest Ophthalmol Vis Sci* 47:3523–3530.
- Yip V, Carter JG, Pusateri ME, McDougal DB, Lowry OH. 1991. Distribution in brain and retina of four enzymes of acetyl CoA synthesis in relation to choline acetyl transferase and acetylcholine esterase. *Neurochem Res* 16:629–35.
- Yonehara K, Balint K, Noda M, Nagel G, Bamberg E, Roska B. 2011. Spatially asymmetric reorganization of inhibition establishes a motion-sensitive circuit. *Nature* 469:407–10.

## Resources cited

B6.129P2-*Cacna2d3*<sup>tm1Dgen</sup>/J mice (The Jackson Laboratory, RRID: IMSR\_JAX:005780)  
mouse monoclonal anti-calbindin antibody (Swant Cat# 300 RRID:AB\_10000347)  
rabbit polyclonal anti-calbindin antibody (Swant Cat# CB 38 RRID:AB\_10000340)  
chicken polyclonal anti-neurofilament H antibody (Abcam Cat# ab4680, RRID:AB\_304560)  
goat polyclonal anti-choline acetyltransferase antibody (Millipore Cat# AB144P, RRID:AB\_2079751)  
rabbit polyclonal anti-melanopsin antibody (Advanced Targeting Systems Cat# AB-N39, RRID:AB\_1608076)  
chicken polyclonal anti- $\beta$ -galactosidase antibody (Abcam Cat# ab9361, RRID:AB\_307210)  
Fiji (RRID:SciRes\_000137)  
PatchMaster (v2x69, RRID:SciRes\_000168, HEKA)
